# Supplementary material for: Genetic basis of maize kernel protein content revealed by high-density bin mapping using recombinant inbred lines
Source: Front Plant Sci. 2022 Dec 15;13:1045854. doi: 10.3389/fpls.2022.1045854 (PMC9798238; doi:10.3389/fpls.2022.1045854)
Supplement: Supplementary file 2 [file DataSheet_2.xlsx]

## Sheet: Table S1
Supplementary Table 1. Insertion-deletion (indel) markers used in this study
Primer name	Primer sequence (5'to3')
IndelPC2-2 -F	TAGAGCACAGCAATACCACC
IndelPC2-2 -R	GAAACCTCGGATGAGTCG

## Sheet: Table S2
Supplementary Table 2. TPM in maize inbred populations of genes in the MK1130–MK1132 (Chr2:16.80 Mb to 17.25 Mb) interval and known genes that were identified and associated with PC traits in this study
Lines	PC_BLUE	Zm00001d002609	Zm00001d002610	Zm00001d002611	Zm00001d002612	Zm00001d002613	Zm00001d002614	Zm00001d002615	Zm00001d002616	Zm00001d002617	Zm00001d002618	Zm00001d002620	Zm00001d002621	Zm00001d002622	Zm00001d002623	Zm00001d002624	Zm00001d002625	Zm00001d002626	Zm00001d002627	Zm00001d002628	Zm00001d002629	Zm00001d027957	Zm00001d020591	Zm00001d020592
A002	13.2707	2.11687	3.12833	4.32347	0	0.294656	0.285737	4.25053	0.0181326	5.40719	1.54268	0	0.367107	0	0	0.736898	14.6285	0	0	0.0942309	0	0.139284	27475.5	142403
A003	13.1953	2.20834	0.513484	4.89551	0	0.234915	0.491202	4.66598	0.108422	4.19328	7.95593	0.24145	0.341456	0	0	0.5379	3.64677	0	0	0.169033	0	0.14122	25289.1	111588
A004	14.7729	1.29258	0.0880183	4.28706	0	0.0939578	0.298967	4.37653	0.121422	5.44943	2.02916	0	0.249729	0	0.0722307	1.03451	10.499	0	0	0.180286	0.0159412	0.417105	30698.3	156524
A005	12.4776	0.188104	1.50506	6.82372	0	0.0256376	0.0186462	7.61403	0.0378645	3.71737	8.15424	0.210807	0.264049	0	0	0.679468	0.538348	0	0	0.0983868	0	0.420474	21039.1	187370
A006	12.6162	2.15503	0.336797	2.71526	0	0.77041	0.0560317	5.75186	0.0284457	3.32673	1.73945	0	0.17917	0	0.0296129	0.67935	9.94908	0.0560085	0	0.129348	0.0261421	0.163878	18021.6	138728
A007	13.4099	1.37227	3.19681	2.51064	0	0.334691	0.100232	3.30397	0.0726925	2.01759	3.94263	0.404708	0.130819	0	0	0.767322	1.48828	0	0	0.151107	0	0.0873992	24741.2	122359
A008	11.2065	1.82212	2.78337	3.94203	0	0.295329	0.0683429	3.81381	0.0594785	3.45862	4.84945	0	0.205157	0	0	0.251135	2.64165	0	0	0.0515161	0	0.350937	20470.5	125699
A009	11.0899	1.60468	0.688883	1.65763	0	0.114109	0.0691594	3.82616	0.140441	3.35084	0.29871	0.390945	0.221148	0	0.116963	0.574452	9.61865	0	0	0.127722	0	0.171199	27461.3	156418
A010	12.8343	0.182912	1.01719	4.19024	0	0.664796	0.417023	3.34916	0.0122731	3.00893	3.65459	0.136658	0.226391	0	0	0.430758	0.578329	0	0	0.0956708	0	0.1906	22216	129880
A011	12.523	1.66748	0.969309	4.77305	0	0.044345	0.145134	6.83399	0.0327469	5.6665	2.96016	0	0.383058	0	0	0.747506	11.1342	0	0	0	0	0.330835	28856.6	157233
A012	11.3149	1.96751	0.387047	3.51378	0	0	0.0346724	4.1577	0.0528066	4.04556	0.280792	0	0.34845	0	0	0.599218	10.1822	0	0	0.114344	0.0323534	0.114635	14713.4	152391
A013	13.0463	1.54884	0.899585	4.44549	0	0.0745052	0	5.70201	0.0183396	4.7057	10.8246	0.306312	0.297039	0	0	0.203267	8.35884	0	0	0	0	0.214375	36720.1	127641
A014	13.782	0.479217	0.702852	3.80894	0	0	0.0219245	5.41745	0.0148406	4.16779	1.57826	0	0.133537	0	0.0617982	0.356387	0.735487	0.0194804	0	0.0771235	0	0.133823	33482.7	125171
A015	10.8037	0.354551	0.680401	3.47435	0	0	0	5.07937	0.0389288	4.52938	0.965994	0.072244	0.15179	0	0	0.33901	9.309	0	0	0.101152	0	0.00866752	30286.8	299929
A016	12.6627	0.828071	1.57886	5.59853	0	0.511638	0.437781	5.7666	0.0444498	5.8243	1.77267	0.371204	0.259976	0	0.0462736	0.651014	20.4038	0	0	0.0866234	0	0.0853596	21990.3	141297
A017	11.068	0.504996	1.37551	4.34833	0	0	0.0200234	6.46656	0.0203307	5.35653	7.24307	0	0.100616	0	0	0.498956	12.0247	0	0	0.184894	0	0.00678995	32091.2	287860
A018	10.0075	1.00809	0.903234	6.78513	0	0	0.0105187	11.3521	0.106801	6.82421	6.13334	0.237842	0.259473	0	0.0889469	1.03154	11.6966	0	0	0.194258	0.0196304	0.0214014	21187.2	150766
A019	12.1247	1.8021	1.29727	3.49753	0	0.224564	0.51039	6.54684	0.0414577	6.55113	0.440891	0	0.345062	0	0	0.908052	19.6703	0	0	0.161585	0	0.100382	37213.6	152407
A020	17.6771	2.10763	0.385053	3.09844	0	0.252227	0.214018	6.00857	0.0620862	5.09646	0.330135	0.11522	0.28864	0	0.215446	0.709978	18.7474	0.0814967	0	0.215099	0.0380388	0.304118	46323.3	136926
A021	13.4759	1.01013	0.584675	7.13548	0	0.11014	0.0200262	9.16907	0	5.59587	3.6761	0.113205	0.311037	0	0.0423356	0.563416	1.30506	0	0	0.211338	0	0.0067909	13070.1	162800
A022	12.1197	0.542938	0.850345	6.40653	0	0.207198	0.0645835	10.0815	0.0655745	7.23292	9.87937	0.121693	0.629382	0	0	0.640272	2.3974	0	0	0.113592	0	0.00365005	29424.8	164626
A023	11.8582	1.4702	0.273037	1.5984	0	0.0546491	0.0728679	5.18736	0.026904	3.58419	0.715292	0	0.19972	0	0.252071	0.404687	11.5519	0	0	0.0873839	0.0123626	0.159489	32502.1	172338
A024	12.6914	0.479071	0.285447	7.12343	0	0	0.0237443	7.31232	0	6.01622	7.1789	0.671113	0.282012	0	0.0501958	0.36264	8.20692	0	0	0.313219	0	0.0644137	18864	172311
A025	13.4122	2.50802	0.320221	2.6328	0	0.113943	0.227894	5.45801	0.105178	5.31845	7.27049	0.117113	0.227136	0	0	0.449642	4.64853	0	0	0.601244	0	0.0807917	50676.1	166504
A026	11.8881	0.895139	1.41158	4.77787	0	0	0.00934022	5.05707	0	4.70348	4.33676	0	0.213334	0	0.0394906	0.565596	14.3002	0.124484	0	0.172493	0	0.0285054	17565.2	168892
A027	11.0646	1.08702	1.59145	6.56929	0	0	0.0107753	4.89434	0.0656437	5.1865	12.3332	0.609108	0.216579	0	0.0911163	0.698691	17.6173	0	0	0.170568	0	0.0182695	19632.5	260584
A029	12.2892	0.985761	0.671256	3.87172	0	0	0	5.3074	0.0208872	4.62083	0	0	0.234932	0	0	0.325208	11.6412	0	0	0.135683	0.0191957	0.041855	32619.8	252631
A030	12.6438	0.38005	2.14431	6.44105	0	0.147996	0	8.18435	0	5.87857	2.67319	0	0.285184	0	0	0.542203	1.42066	0	0	0.0851926	0	0.145999	43424.5	160379
A031	12.4282	0.332448	0.0754605	3.10997	0	0.120829	0.0805553	3.22655	0.0743558	3.72499	0.711678	0	0.127122	0	0	0.463078	9.14604	0	0	0	0	0.0124165	27602.7	127597
A032	12.1805	0.540761	1.03105	5.70826	0	0	0	11.0929	0.087082	6.64191	1.96795	0	0.362402	0	0	0.407901	1.37961	0	0	0.254557	0	0.0836144	37904.8	126211
A033	14.0947	0.326969	0.185542	3.49319	0	0.118838	0.0324114	7.77314	0.0438782	4.44164	0.933266	0	0.355339	0	0.0456786	0.399481	0.784268	0.0287981	0	0.199522	0	0.0879256	34326.9	243414
A034	10.8204	1.31714	0.20698	3.63507	0	0.0276183	0.241041	4.67138	0.0407899	4.26623	4.44635	0.227094	0.119285	0	0	0.608176	15.4927	0	0	0	0	0.0340571	37361.3	129121
A035	10.9113	2.48482	0.597192	2.95222	0	0.0265621	0.115911	5.94058	0	4.19821	0.4172	0	0.317696	0	0	0.419277	5.00392	0.0257474	0	0.0764511	0	0.0327546	41736.9	143143
A036	10.6905	0.492407	0.409818	5.26937	0	0.0596553	0.0108468	7.73512	0.0440529	5.9963	2.5767	0.12263	0.198196	0	0.0458605	0.232505	0.984238	0	0	0.228933	0	0.0772412	32935.4	143426
A037	10.8652	2.43984	0.949381	4.39068	0	0.0475053	0.164115	7.14838	0.0350806	5.41444	3.26439	0	0.284093	0	0.10956	0.273097	5.65745	0	0	0	0	0.0937286	40762.1	170540
A038	12.5445	1.38575	0.377453	3.0405	0	0.0604385	0.329676	6.14954	0.0669469	6.15533	2.96651	0.12424	0.200798	0	0	0.706673	3.57165	0	0	0.0289924	0	0.652127	38464.5	137893
A039	12.3426	0.31357	1.45198	7.06009	0	2.05142	0.0870329	9.39732	0.353473	9.23949	8.86071	1.40566	0.431651	0	0.0525681	0.73957	1.59998	0	0	0.131209	0.0464068	0.0421612	36993.4	140151
A040	11.836	1.3544	1.03757	4.60281	0	0.161523	0.0335644	6.44126	0.119278	4.62008	0.453031	0.379467	0.12266	0	0	0.517115	7.91864	0	0	0.0664136	0	0.0682901	20319.1	148669
A041	12.03	1.86404	0.753662	5.18299	0	0	0.692911	6.32614	0.0469028	5.80084	7.23259	0.261127	0.0844073	0	0	0.352754	5.71588	0	0	0.121872	0	0.0861543	28037.2	121430
A042	12.0414	0.224141	0.213681	6.30464	0	0	0.00888732	8.58222	0.0721895	7.50796	4.12647	0.502385	0.308545	0	0	0.428632	0.909073	0	0	0.164129	0.0331717	0.0421917	27929.9	128399
A043	11.135	2.5985	0.0340279	4.47812	0	0.0817293	0.198138	5.58889	0.0804714	4.04459	0.427896	0.224008	0.208176	0	0.0418866	0.472498	7.94348	0	0	0.182959	0	0.0671888	26525.7	133317
A044	11.3001	2.22864	0.0843109	6.69937	0	0.0450001	0.0245464	6.84575	0	4.45823	1.14855	0	0.321439	0	0	0.684008	4.23869	0	0	0	0	0.0277456	9568.38	134277
A045	13.1829	1.19457	0.301276	2.29988	0	0.289445	0.131571	5.41841	0	4.56751	3.40965	0.297498	0.232396	0	0	0.611057	12.1268	0	0	0	0	0.163591	40867.7	120878
A046	11.5563	1.83835	0.403815	3.06374	0	0	0.0705403	6.51495	0.0238742	7.22769	3.55454	0.132917	0.343716	0	0	0.617423	12.2391	0	0	0.217121	0	0.0956809	37152.2	119081
A047	11.5135	1.41331	0.996767	6.05254	0	0.082554	0.220152	7.23615	0	4.92474	1.72886	0.113134	0.539405	0	0.0423093	0.370015	1.41982	0	0	0.0528015	0	0.0712601	47681.6	167587
A048	13.1375	1.44763	0.265399	4.4391	0	0.394608	0.0220767	8.9848	0.0672464	7.22445	0.715148	0	0.352969	0	0.0933409	0.603359	10.0526	0	0	0.262099	0.0206002	0.217101	21105.3	124960
A049	11.5669	1.19957	0.294065	4.22342	0	0.104636	0.0380509	4.72702	0.0772694	3.98943	2.3625	0.107547	0.18251	0	0	0.728973	13.654	0	0	0	0	0.170965	30187.5	124384
A050	10.8944	1.11347	0.19567	2.1306	0	0	0.0569676	3.57733	0.0144604	3.37777	1.30715	0.0805069	0.240715	0	0.060215	0.503712	9.93903	0	0	0	0	0.461211	28343.2	135262
A051	11.885	0.969016	0.451479	3.04151	0	0.639504	0.0909997	5.88777	0.0410649	16.0267	0.873428	0	0.332555	0	0.12825	0.633949	12.5945	0	0	5.20175	0	0.418298	29144.5	153119
A052	11.795	1.11264	0.654341	3.79029	0	0.165433	0.0802128	4.83664	0	10.9679	2.92319	0	0.247333	0	0	0.505071	13.3991	0	0	0.0529056	0	0.387603	18078.6	173822
A053	10.7255	0.748052	0.39619	6.63999	0	1.58597	0.148304	8.73465	0.0669241	5.30075	6.40547	0	0.338732	0	0	0.379707	0.394197	0	0	0.0652106	0	0.00279388	35558.6	234243
A055	11.6546	1.00691	0.144349	4.17449	0	0.115567	0.0210129	5.53579	0.0213353	4.74666	0.226895	0	0.17278	0	0	0.630587	16.571	0	0	0	0	0.224453	29261.8	135510
A056	10.7009	1.00511	0.038024	4.9862	0	0.0304424	0	6.21506	0.0224804	4.58288	3.70563	0.375472	0.111255	0	0	0.599175	11.1228	0	0	0	0	0.551832	34077.7	136127
A057	11.8191	1.28678	0.0365098	5.3519	0	0	0.0106295	6.55659	0.0215852	5.63978	1.26254	0	0.233071	0	0	0.882909	18.0804	0	0	0	0	0.702871	27081.8	144544
A058	10.7421	2.47421	2.09666	4.13815	0	0.0599504	0.534122	7.46639	0.199218	7.45972	2.35404	0	0.3386	0	0	0.817792	12.0311	0	0	0	0.0813712	0.395509	26493.4	158216
A059	10.3849	1.65732	0.313488	4.74217	0	0	0.0730154	5.87849	0.0185339	4.08571	7.09572	0.412743	0.233478	0	0	0.699409	10.9018	0	0	0	0	0.714931	22732	133958
A060	13.2616	2.18344	0.515835	3.93637	0	0.0485862	0.0706733	4.29353	0.0179394	4.31673	10.6837	0.199752	0.306699	0	0.037351	0.454472	12.1262	0	0	0	0.0329733	0.0479307	32220.4	159813
A061	11.1433	1.2521	0.13642	5.25493	0	0	0	6.04353	0	3.52061	0.536081	0	0.181432	0	0	0.537419	8.89521	0.0264673	0	0	0.0555915	0.215491	27835.7	152974
A062	10.7638	1.06961	0.0728351	6.89042	0	0	0.0106026	6.64598	0	3.93113	2.86216	0.359609	0.251855	0	0	0.63636	8.46633	0	0	0.0279725	0	0.0934793	20905.3	163328
A063	12.7297	0.317093	0.167942	4.42701	0	0	0.188594	4.82886	0	4.7735	1.13134	0	0.12125	0	0.0295326	0.299451	0.5301	0	0	0.165853	0.0391068	0.0378976	21352.8	222297
A064	11.4491	3.09161	0.499548	4.01064	0	0.0857021	0.041554	5.65294	0	4.03326	1.90696	0	0.180331	0	0	0.734847	10.3692	0	0	0	0	0.190228	19884.8	162107
A065	11.1414	0.965015	0.438086	4.23163	0	0.043842	0.119573	6.11196	0	5.12356	5.59494	0.0901235	0.174791	0	0.0674078	0.781745	11.1789	0	0	0	0.0297536	0.529818	21938.1	143783
A066	13.2515	2.06973	0.838921	4.10181	0	0.0537319	0.234474	5.35176	0	3.92031	1.26592	0	0.178516	0	0	0.554959	7.20489	0	0	0	0.0182327	0.347858	41181.6	148492
A067	11.1699	1.39228	0.424139	5.23469	0	0.0399494	0.145276	5.5759	0.0147505	4.62711	1.25494	0	0.331816	0	0	0.79408	9.40738	0.019362	0	0	0	0.472925	15665.9	185160
A069	13.8822	1.03686	0.20173	2.85005	0	0	0.0391546	4.61515	0	4.34151	8.13866	0.442668	0.143089	0	0.206933	0.493085	9.399	0	0	0.232425	0	0.00331933	27148	146827
A070	9.82656	1.93187	0.640889	6.4453	0	0.0810161	0.117846	6.12001	0.179481	5.6723	1.48457	0	0.314025	0	0.124563	0.705193	15.3109	0	0	0	0.054982	0.053282	18186.2	161972
A071	11.1096	1.07456	1.03106	3.27112	0	0	0.0871504	5.18129	0.0393278	4.49787	1.77752	0	0.212325	0	0	0.591565	11.2789	0	0	0	0	0.341498	36002	137838
A072	11.4328	0.743259	0.534242	4.46414	0	0.0225115	0.0573041	4.87851	0.0332476	4.16141	3.27061	0	0.149583	0	0	0.570298	10.224	0	0	0	0	0.0222078	22162.6	159941
A073	11.0186	1.444	0.444069	6.13517	0	0	0.0461739	5.39427	0.0750117	4.00783	0.398865	0.104405	0.168741	0	0	0.668084	6.35328	0	0	0	0	0.335072	14546.8	184737
A074	11.5041	1.45993	0.629624	4.79557	0	0	0.192957	5.46904	0.117551	3.30126	2.50024	0	0.23799	0	0	0.765181	7.03541	0	0	0	0.0540156	0.2879	9526.1	135347
A075	11.9522	1.58605	0.249237	4.00758	0	0.0665138	0.112876	5.60312	0.0327451	4.91052	3.74353	0	0.272545	0	0.0681773	0.704258	12.783	0	0	0.0638134	0	0.188647	28449.7	153466
A076	11.432	2.406	1.16052	4.52389	0	0	0.248436	6.55401	0.0403597	5.28522	2.25338	0	0.417635	0	0	0.58046	11.0338	0	0	0	0.0741825	0.353828	29667.3	165806
A077	11.3293	1.42092	0.347335	3.90403	0	0.0397257	0.158908	5.42	0.0293357	5.30802	5.69359	0.734957	0.263966	0	0.0305394	0.665768	4.74289	0	0	0	0	1.43777	32153.9	150114
A078	10.7836	2.99444	0.986646	5.20608	0	0.500282	0.0287253	5.88881	0.019444	6.61052	6.72042	0.541264	0.244943	0	0	0.615738	8.00917	0	0	0.227354	0.0357388	0.0454569	32572.7	121234
A079	12.567	0.782287	0.689377	3.2726	0	0.602097	0.136845	4.71569	0.0185259	4.50713	0.788074	0	0.0916841	0	0	0.439998	9.82848	0	0	0.192551	0	0.114464	30995.7	109593
A080	13.1804	0.836471	0.126577	4.47565	0	0	0	6.0427	0.149669	4.08617	0.298442	0	0.117839	0	0	0.745498	14.3941	0	0	0	0	0.084351	31738.9	121719
A081	11.0986	0.835068	0.631824	4.39417	0	0.126461	0.285122	5.21374	0.0933862	5.13422	8.64029	0.727885	0.336119	0	0.466646	0.591455	5.53858	0	0	0.0727961	0	0.149706	27818.6	147751
A082	12.9456	2.29416	0.58252	3.16215	0	0.127192	0.177304	3.86568	0.0156543	4.39387	1.99776	0.0871539	0.161988	0	0	0.318092	5.7868	0	0	0.183042	0	0.0339831	25094.7	135592
A083	11.2973	1.13345	0.0296856	3.83714	0	0.0237666	0	4.91494	0	4.96729	1.11987	0	0.110545	0	0	0.592829	17.9804	0	0	0	0	0.164121	26553.8	133241
A084	11.9679	0.377423	0.186914	5.1319	0	0	0.108837	4.16496	0.0276266	4.48874	0.734505	0	0.205085	0	0	0.430138	0.864135	0	0	0.0717848	0	0.01384	20138.9	213182
A085	10.9219	0.895543	0.127046	4.46249	0	0.0406858	0	5.12762	0.0300447	3.99791	1.99699	0.0836355	0.216276	0	0	0.455894	14.1576	0	0	0	0	0.165565	24012.5	159861
A086	11.6122	2.22325	1.27645	4.86582	0	0.213893	0.345698	4.73424	0.0526504	5.37904	8.39884	0.195417	0.292148	0	0.109621	0.625233	12.5189	0	0	0	0.0161289	0.0468906	33513.6	134346
A087	10.7382	1.50429	0.146335	6.38732	0	0.0234315	0.0937292	6.57956	0.38067	6.58654	0.644051	0	0.280252	0	0	0.876707	11.9773	0.0227128	0	0	0	0.109798	17192.1	152221
A088	10.3483	0.627082	0	4.63039	0	0.0262977	0.0191263	8.06203	0.0194198	4.92816	11.6686	0.216235	0.209689	0	0	0.522723	11.77	0	0	0.0252301	0	0.457244	24712.6	153932
A089	11.7676	1.61217	0.403278	2.72809	0	0.0717485	0.143502	3.92866	0.0397374	3.81317	11.2692	1.17991	0.137065	0	0	0.499853	10.2341	0	0	0	0	0.0530853	27953.2	130928
A090	11.0846	1.36401	0.180606	4.31375	0	0	0.0150233	6.18245	0.0305077	4.6824	4.62329	0.169849	0.233335	0	0.063519	0.611859	14.0535	0	0	0.0396355	0	0.249627	27082.7	133546
A091	12.21	0.866701	0.10264	4.31426	0	0	0	4.33669	0.045512	3.12119	1.45202	0.168922	0.163809	0	0.157931	0.544467	5.57104	0	0	0	0	0.0126666	15278.4	126404
A092	12.9824	1.41175	0.0712098	3.16823	0	0.0570113	0	4.76496	0	5.07514	0.447726	0	0.170471	0	0	0.516615	8.44843	0	0	0	0	0.253089	23736.4	129975
A093	10.383	2.8825	1.14119	3.96566	0	0	0.132899	4.30404	0.0809629	4.52214	3.44407	0	0.224625	0	0.0561899	0.587552	14.2409	0	0	0.0350622	0.0372031	0.387568	17792.3	160084
A094	11.73	2.37507	0.115522	2.66455	0	0	0.0168166	5.1101	0.0512239	5.1772	1.27109	0.190122	0.284232	0	0	0.405529	11.7775	0	0	0.0443665	0	0.179629	24993.2	146476
A095	11.9182	3.23437	0.202858	2.80943	0	0.0232014	0.0253115	5.1813	0.0513998	5.3424	3.55305	0.286163	0.331458	0	0	0.393357	10.4816	0	0	0.222594	0	0.0944145	19635.6	158281
A096	12.1518	2.07942	0.625668	4.87339	0	0.026364	0.038349	4.92953	0.0194687	4.80046	1.8634	0	0.175181	0	0	0.652482	18.5536	0	0	0.0252936	0	0.396626	17275.3	303991
A097	12.2851	2.1444	0.357608	3.34959	0	0.548751	0.043381	4.51627	0.0704746	10.6953	8.0569	0	0.229875	0	0.660297	0.158081	3.83619	0	0	0.0915603	0	0.244195	24875.9	319296
A098	11.8931	1.86618	0.147765	4.38748	0	0	0	4.11919	0.0349445	3.37055	1.85813	0	0.102191	0	0	0.304313	14.0249	0	0	0	0	0.370542	18151.3	187667
A099	11.6049	0.725144	0.31951	4.99243	0	0.0697645	0.0591961	4.99349	0	5.22842	1.18708	0.0956072	0.162248	0	0	0.534747	16.0446	0	0	0.0223107	0.031564	0.0315439	30406.8	149551
A100	12.5391	1.80133	0.100132	2.76681	0	0.0601252	0.00728816	4.63459	0.0148	5.98101	0.157394	0	0.113196	0	0	0.476484	10.0041	0	0	0.0576841	0	0.059314	25639.1	275716
A101	11.1826	1.42989	0.335755	5.00038	0	0.0537617	0.00977519	5.15049	0	5.10265	1.16107	0	0.214339	0	0.0413297	0.639081	15.4499	0	0	0	0	0.109387	25072.5	244849
A102	13.4253	1.71324	0.23863	3.91153	0	0.0424554	0.115792	5.40674	0.0313515	19.0122	7.33513	0	0.345577	0	0	0.699106	7.06829	0	0	0.162927	0.0144063	0.0680592	33479	129731
A103	11.9542	1.72001	0.120128	5.00712	0	1.03389	0.0612048	7.83177	0	4.62524	1.03853	0.0988514	0.311542	0	0.443614	0.707515	13.9636	0	0	0.20761	0	0.0148247	32197.1	158951
A104	11.7324	1.1451	0.617307	5.27997	0	0.104047	0.170264	4.00436	0.0192085	3.46809	1.3278	0.213883	0.146914	0	0	0.339623	8.08382	0	0	0.124778	0	0.0673595	17284.9	159065
A105	12.6094	0.45492	0.619558	4.62935	0	0.0676397	0.196777	4.16361	0.049949	3.86571	4.42662	0	0.217232	0	0.138663	0.391042	13.8516	0	0	0.0648935	0	0.0528256	25005	177342
A106	11.8773	2.44628	0.89697	3.1566	0	0.164142	0.0298451	5.34115	0.030303	4.7387	6.68699	0.0843546	0.204502	0	0	0.495799	13.3438	0	0	0	0	0.144217	32519.9	163767
A107	10.7509	2.85374	0.744916	3.337	0	0.0259299	0.0188587	5.68782	0	5.52129	1.42544	0	0.284289	0	0	0.48004	12.9899	0	0	0.124386	0	0.0287775	20651.4	193045
A108	9.58808	1.31017	0.535297	4.35934	0	0.0238091	0.051949	5.74961	0.0703281	5.1825	1.68282	0	0.31641	0	0.0366069	0.296946	0.214266	0	0	0.137055	0	0.0293599	21039.1	233823
A109	12.1745	0.26175	0.249535	5.96012	0	0.4281	0.0830284	3.31875	0	4.49433	4.0344	0	0.113784	0	0	0.472745	19.2288	0	0	0	0	0	18940.8	170956
A110	12.4069	0.570438	0.0517922	5.14226	0	0	0	4.78067	0	4.18708	5.45446	0.596665	0.11021	0	0.0637536	0.371703	3.8933	0	0	0.0397818	0	0.0588022	41684.3	146620
A111	11.7485	1.18849	0.258977	4.71504	0	0.181422	0.065974	5.43681	0.0574168	4.54847	0.203538	0.213108	0.111939	0	0.079697	0.535367	10.2314	0	0	0.174057	0.035178	0.319597	32330.1	141956
A112	11.2229	1.23025	0.279247	3.50491	0	0.201211	0.0894302	4.05471	0	4.56674	5.96953	0.18383	0.0891326	0	0	0.396464	10.8377	0	0	0	0.0303451	0.330827	16143.2	192226
A113	10.7755	1.66056	1.4966	4.68827	0	0.266265	0.0290481	6.23645	0	5.75576	7.00503	0	0.238849	0	0	0.77832	17.4124	0	0	0.0766363	0	0	21109.8	149713
A114	11.0388	0.893068	0.143091	4.55696	0	0.744641	0.0416597	5.3551	0	6.09175	0.899674	0.117747	0.133213	0	0	0.552538	13.162	0	0	0.137386	0	0	40216.8	149286
A115	11.3505	1.08619	0	2.65571	0	0.049347	0.10767	4.32001	0.0364406	4.04794	1.74391	0.10144	0.155751	0	0	0.370233	9.4887	0	0	0.0710153	0	0.0760643	22788.2	256808
A116	13.3563	0.384518	0.756423	4.75522	0	0.6056	0.177875	4.86303	0	5.73739	1.09753	0	0.139294	0	0	0.735327	13.2057	0	0	0.26816	0	0.0172335	28502.3	141634
A117	13.7505	0.767317	0.104501	3.27906	0	1.81274	0.0101415	5.86865	0	5.13922	1.86162	0.114656	0.0833892	0	0	0.527164	8.26544	0	0	0.160536	0	0.0412679	25911.6	168266
A118	11.8539	1.35325	0.273959	3.06763	0	0.0797579	0	3.5636	0	4.23884	0.313181	0	0.0794953	0	0	0.396339	12.2858	0	0	0.0382599	0.013532	0.0786818	14802.4	296399
A119	9.98478	1.02649	0.121564	3.18821	0	0.072994	0.0530884	4.48516	0.0539029	5.08815	1.24203	0	0.210177	0	0	0.540535	9.78045	0	0	0.0933739	0	0.0750095	29500.2	280032
A120	12.463	2.04302	0.968869	4.11867	0	0.119336	0.028931	3.6992	0.0293749	4.64871	4.60782	0.327084	0.251103	0	0	0.507745	18.6747	0	0	0.0763275	0.013498	0.0441473	17737	160798
A121	12.6829	0.98824	0.224315	3.54556	0	0	0.0244902	3.04795	0	4.02268	3.17332	0.184585	0.104415	0	0	0.516207	11.7173	0.02176	0	0.15076	0	0.0359867	26503.3	137183
A122	12.1082	1.22343	0	5.6776	0	0.0229996	0.00836377	5.38696	0	5.41816	5.41867	0.189116	0.236879	0	0	0.699194	17.8831	0	0	0.176526	0	0.0113446	34720.5	173676
A123	11.5954	2.56652	0.47333	3.56386	0	0.262352	0.0424017	4.24676	0	14.5425	1.25909	0	0.300227	0	0	0.391962	10.2484	0	0	0.139833	0	0.0359461	24311	158650
A124	11.8271	0.774109	0.658914	2.5181	0	0.654141	0.0613878	4.07796	0.0311648	4.47364	0.828574	0	0.189286	0	0.0648872	0.242613	0.417774	0	0	0	0.028641	0.0702561	26307.6	172562
A125	11.0617	2.6729	0.587134	2.22729	0	0.305543	0.170939	4.75956	0.0347123	4.285	2.86096	0.386515	0.132747	0	0.10841	0.558781	14.0586	0	0	0.0225491	0	0	25382.5	190154
A126	11.2571	0.16541	0.197114	3.12551	0	0.0676334	0.0573879	3.7685	0	2.9485	16.1114	1.48299	0.269643	0	0.207975	0.430546	7.83135	0	0	0.151404	0	0.0667208	27913.7	168227
A127	12.0769	0.290595	1.15431	4.77272	0	0	0.0192038	7.50155	0.0194984	4.51188	1.86625	0.217111	0.175449	0	0	0.679207	12.8949	0	0	0	0	0.283272	36306.4	168962
A128	14.0236	0.129745	0.32395	3.80669	0	0.0707339	0.0342964	5.88851	0.0522339	4.08613	6.94367	0.0969357	0.148835	0	0	0.57434	9.25128	0	0	0.0226207	0	0.314008	49123.4	147803
A129	12.9069	0.887824	0.997534	5.54949	0	0.338815	0.176014	5.3246	0.0178715	5.48032	4.37134	0	0.377902	0	0.632562	0.485764	13.3725	0	0	0.0928741	0	0.235761	29430.4	160880
A130	13.0257	0.523274	0.475099	3.1985	0	0.30905	0.250707	3.88748	0	3.25201	1.30688	0	0.189558	0	0.219309	0.569828	9.02833	0	0	0.0456158	0	0.0322469	15430.3	156358
A131	12.0308	0.399221	0.475738	4.29692	0	0.462498	0.286907	4.27805	0.0200903	4.17106	0.534137	0	0.198852	0	0.0418293	0.599091	10.2993	0	0	0.0261012	0	0.0570322	24754.4	186009
A132	11.9109	2.23128	0.455818	4.11294	0	0.0486577	0.12386	6.06801	0.0359316	6.18104	0.668715	0	0.145492	0	0.037406	0.611596	8.0571	0	0	0.0466822	0	0.0330008	21999.3	152912
A133	10.8114	0.266313	0.0518133	4.61051	0	0.0207411	0.0527975	4.30299	0	4.76871	2.28041	0	0.172274	0	0	0.638621	10.938	0	0	0.0596972	0.0140761	0.0588262	25277.8	225811
A134	11.4393	2.61079	0.582391	3.70369	0	0.147243	0.116013	4.38589	0.0906103	5.03831	0.674531	0	0.154911	0	0.0754625	0.636044	12.1319	0	0	0.0941764	0	0.0756541	30058.9	129043
A135	14.5841	2.38211	0.616401	2.70448	0	0.103894	0.170014	4.59052	0	5.2275	3.87557	0.213569	0.276138	0	0	0.556771	11.5937	0	0	0.24919	0	0.080072	24427.3	249872
A136	12.5342	1.8866	0.133821	4.01106	0	0	0.00779218	5.79039	0.158235	16.0819	6.14216	0	0.22781	0	0.164727	0.309002	2.67398	0	0	0.37004	0	0.0422773	18293.4	316421
A137	14.7863	1.67174	0.234371	4.70415	0	0.134028	0.0487393	5.22464	0.0197948	16.73	0.736795	0	0.27608	0	0	0.370884	3.03953	0	0	0.128587	0.0545754	0.046277	21388.8	148500
A138	11.8279	2.25417	0.852768	3.7941	0	0.0910313	0.0248276	5.78142	0	6.23678	4.64682	0.280692	0.181463	0	0	0.607581	15.5788	0	0	0.0436677	0.0154447	0.0252571	29437.1	166864
A139	14.6653	0.795417	0.180547	3.32587	0	0	0.0175215	3.70872	0	3.36513	5.58128	0	0.0720358	0	0.0370407	0.117369	0.187898	0	0	0.0693395	0	0.160422	25792.5	173173
A140	12.7358	3.60196	0.252491	5.74354	0	3.75415	0.0840118	7.51748	0	17.6531	9.75188	0.237452	0.441339	0	0.444004	0.512109	2.47755	0	0	0.221645	0	0.146003	24346.8	191244
A141	11.2942	1.86925	0.913854	3.76017	0	0.10452	0.0380086	5.25696	0.0192959	5.70278	0.61562	0	0.147582	0	0.0803506	0.74344	15.959	0	0	0	0.0177333	0.035444	18659.2	247300
A142	12.2906	2.16101	0.0358913	4.45439	0	0.804577	0.0835953	8.23962	0	4.77069	0.338495	0	0.286403	0	0.132541	0.86795	25.325	0	0	0.0275683	0	0.0425208	52386.7	218648
A143	12.4785	1.12525	0.83287	4.21264	0	0.106689	0.455867	5.91233	0.0393925	5.34962	5.865	0	0.239259	0	0.328071	0.644515	5.77675	0	0	0.153536	0.0362024	0.0427575	26803.8	149985
A144	12.1485	2.43207	0.0331225	4.90189	0	0.0530364	0.106076	5.49274	0	6.32673	0.937148	0	0.193826	0	0.0815442	0.837167	10.9618	0	0	0.228974	0	0.0196203	25547.5	169509
A145	10.6584	1.19327	0.270854	5.32768	0	0.108424	0.206999	6.65323	0.0200166	10.1405	2.55446	0	0.342212	0	0.0416759	0.390887	0.34151	0	0	0.130028	0	0.638425	33911.1	224105
A146	11.6426	1.70313	0.427276	3.31606	0	0.195475	0.0977409	5.05305	0.162394	3.85909	0.383781	0.30137	0.211067	0	0	0.528539	10.1151	0	0	0.117212	0	0.0753271	20505.5	317940
A147	10.6829	2.03245	1.28744	3.63277	0	0	0.112448	4.37552	0.0761156	4.27819	6.7793	0	0.222591	0	0.158477	0.873757	12.0587	0	0	0.098889	0	0.17159	15994.5	168945
A148	11.0433	1.83237	0.0779847	3.51835	0	0.0624353	0.151364	4.30389	0.0614744	4.73686	0.245161	0	0.110631	0	0.159992	0.616461	14.2966	0	0	0.179701	0	0.156549	39056.1	185892
A149	10.4076	2.35933	0.216272	6.49684	0	0.272092	0.233872	6.88856	0.109597	6.24153	0.679897	0.203391	0.262978	0	0.0380314	0.650744	9.08223	0	0	0.118657	0	0.103708	17560.4	256613
A150	10.5811	2.0985	0.564945	5.05818	0	0.319271	0.183829	5.47576	0	4.00532	0.104472	0.109385	0.380096	0	0.286349	0.471816	20.8947	0	0	0.153154	0	0.127954	13582.6	154877
A151	10.5791	0.877676	0.224121	5.3881	0	0.0897167	0.0217503	7.40954	0.0662519	5.45568	2.23114	0.12295	0.268264	0	0	0.710993	10.1552	0	0	0.545137	0.142069	0.269206	31400	155110
A152	11.7008	0.394535	0.328362	5.5781	0	0.0238991	0.225963	5.55027	0.0529453	4.24671	3.65988	0.294768	0.119102	0	0.0734903	0.554219	12.5174	0	0	0.0458575	0	0.079571	16073.5	176760
A153	12.2317	3.11939	0.317038	3.42987	0	0.380736	0.110763	5.32457	0.206182	4.69504	1.29568	0.208709	0.328885	0	0.0780516	0.588617	17.7409	0	0	0.0243519	0	0.0657298	22179.1	179508
A154	11.7466	0.764395	0.122474	4.35926	0	0.0245136	0.115886	4.34059	0.0362044	4.79489	5.77537	0.907041	0.162886	0	0	0.343948	8.07416	0	0	0	0	0.193463	25992.3	180602
A155	12.967	1.90063	0.633352	2.24399	0	0.30865	0.200429	3.80906	0.048841	3.99392	0.60598	0.0906392	0.183115	0	0.0338967	0.554219	11.7058	0	0	0.0846054	0	0.0244676	20794.7	159287
A156	11.0742	2.54394	0.450399	3.42365	0	0.110952	0.0806951	4.84739	0.0204833	4.88399	1.41592	0	0.304113	0	0.127943	0.729729	16.1756	0.0806615	0	0.133059	0.0188245	0.0581479	14055.7	279856
A157	11.7053	0.510124	0.625266	4.848	0	2.39173	0.333741	4.74987	0	4.17386	0.546016	0.114338	0.240233	0	0	0.471505	19.1713	0	0	0.186772	0	0.0754478	23792.9	165496
A158	14.3125	2.45683	0.22521	2.2752	0	0.103032	0.112402	3.76106	0.0190211	3.55626	1.31485	0.211796	0.145481	0	0.198016	0.426661	7.66496	0	0	0.0247121	0	0.0412918	21378.1	143846
A159	11.1982	2.46808	0.0700267	4.52581	0	0.0560641	0.061163	5.54702	0.0207005	4.82242	4.40288	0.345743	0.186265	0	0	0.677376	19.9293	0	0	0	0.0190241	0.252341	16560.3	153959
A160	11.1637	3.50229	0.70979	4.38791	0	0.159114	0.0578617	8.50032	0.15107	5.36531	0.714041	0.280356	0.264317	0	0.0698973	0.473967	14.4965	0	0	0.348924	0.0154262	0.330753	17596.1	228282
A161	10.3126	2.40086	0.31306	3.74686	0	0.22279	0.0708903	5.74995	0.123391	5.33787	0.218705	0	0.388599	0	0.171272	0.48843	17.2594	0	0	0.240463	0	0.0446437	23369.3	262786
A162	11.5561	2.05516	0.46649	5.80878	0	0.0878768	0.311574	6.72778	0.0162233	5.32265	0.258796	0	0.408741	0	0.405335	0.851962	18.8613	0	0	0.189695	0	0.0406364	25727.1	145889
A163	11.5726	2.02612	0.71744	1.65415	0	0.0662757	0.0642696	3.109	0.0326279	2.7719	5.20483	0.363305	0.176153	0	0.0339666	0.15929	4.29434	0	0	0.12717	0	0.00272423	26198.2	168043
A164	11.9315	1.98152	0.196776	6.37195	0	0.0450116	0.0163684	6.49806	0	4.50357	10.6931	0.277583	0.209362	0	0	0.828914	12.0847	0	0	0	0	0.0999096	24624.8	144901
A165	11.1108	0.151178	0.549039	3.10166	0	0	0.0399619	5.68141	0	5.36421	2.80478	0	0.182549	0	0	0.803061	14.3397	0	0	0.0263575	0	0.308287	38440.7	176807
A166	12.1556	0.971606	0.114072	4.74401	0	0	0	5.56941	0.0404647	3.11481	0.860662	0	0.121368	0	0	0.555274	6.5093	0	0	0	0	0.114871	14942.1	132215
A167	13.6681	1.15926	0.303617	1.97649	0	0	0.00883952	4.87431	0	3.62847	2.86345	0.399746	0.113063	0	0	0.606331	10.5731	0	0	0	0	0.167859	38051.2	144566
A168	11.0651	2.18404	0.0291613	4.97121	0	0.0466937	0.0254702	6.26271	0.0862033	5.85063	2.47522	0.383942	0.271483	0	0	0.618758	25.0306	0	0	0	0	0.0460637	18843.6	160280
A169	11.559	1.47417	0.608386	4.18842	0	0	0.0354252	6.42828	0	5.02254	1.14755	0	0.436928	0	0	0.555277	6.09291	0	0	0.140191	0.0330559	0.0330349	24552.7	127825
A170	12.2023	2.72453	1.26159	3.11061	0	0.178242	0.313285	5.4761	0	4.91493	0.933192	0	0.473747	0	0.228375	0.735218	13.1355	0	0	0.0570019	0	0.315042	26817.5	158906
A171	9.85839	3.86972	0.465017	7.69497	0	0.124099	0.349746	9.85964	0.366567	8.14389	0.243646	0.127552	0.474146	0	0.190804	0.955253	13.6809	0	0	0.446477	0	0.0650381	22075	163689
A172	11.0567	2.99031	0.745672	2.36397	0	0.137768	0.0918482	4.68772	0.0169559	5.05631	1.71305	0.0944003	0.152571	0	0.10591	0.563793	16.5859	0	0	0.132174	0.0155828	0.385075	24672	152751
A173	11.5994	2.40062	1.80499	4.59352	0	0.354457	0.287541	6.24211	0.161078	5.61992	0.428254	0.672588	0.398583	0	0.335374	0.579162	18.7466	0	0	0.209271	0	0.0773318	20115.4	148905
A174	11.5436	2.25262	0.132235	2.61345	0	0.317607	0.0230995	4.4557	0.0781796	2.77902	0.914561	0	0.0914509	0	0.032555	0.540534	5.69108	0	0	0.0609424	0	0.143606	27576.9	215413
A175	11.0589	1.43574	0.0838006	4.09472	0	0	0	6.29454	0.0495443	4.30722	0.52689	0	0.208042	0	0	0.706017	16.9997	0	0	0	0	0.375056	23418.4	155711
A176	11.5141	3.72089	0.579143	5.15339	0	0.173875	0.105383	3.8102	0	4.09476	0.796538	1.31056	0.154047	0	0	0.734147	6.65892	0	0	0	0	0.185823	11341.2	165363
A177	11.3132	2.83661	0.511305	2.52764	0	0.11371	0.0992413	3.74893	0	2.57233	0.1786	0	0.113336	0	0	0.350114	7.34056	0	0	0.109093	0	0.0112176	14076.5	333945
A178	11.4009	3.07826	0.690194	2.71761	0	0.0204658	0.0893084	4.84083	0.0302262	3.70994	0	0	0.231182	0	0	0.414778	11.7874	0	0	0.0981744	0	0.171612	16955.2	271481
A179	11.8189	1.96263	0.683077	2.23935	0	0.26155	0.250751	3.08698	0	3.13721	0.0933651	0.0977553	0.252789	0	0.109674	0.426289	17.3038	0	0	0.387803	0	0	19360.2	185332
A180	11.1334	3.30396	0.249982	5.95129	0	0.300207	0.0727801	5.74109	0.0492645	4.75179	0.785872	0.274275	0.387876	0	0.461573	0.617527	14.2087	0	0	0.224015	0	0.185098	13142.6	160028
A181	10.3385	2.53746	0.376993	6.66507	0	0.12576	0.329275	5.95759	0.0928686	12.8443	0	0	0.601661	0	0	0.617586	19.8586	0	0	0.168916	0	0.260533	12222.4	215274
A182	13.1451	1.80472	0.0299738	5.76949	0	0	0.0349064	8.19711	0.265815	5.00166	7.34986	0.493299	0.334856	0	0	0.846436	6.43559	0	0	0.046046	0.0162859	0.0591838	18339.1	102685
A183	10.8315	2.73615	0.89331	2.73731	0	0.0613023	0.00743083	4.4823	0	4.26607	1.52451	0	0.176512	0	0	0.776503	14.8585	0	0	0.0980223	0	0.0957523	27882.6	132575
A184	10.9877	0.646586	0.366912	3.03578	0	0	0.0142431	3.81699	0.0433849	3.58395	0.99967	0	0.169165	0	0	0.526652	12.3602	0	0	0.206673	0	0.103841	15433.7	181529
A185	11.332	2.19396	0.569137	3.08193	0	0.284786	0.528166	5.61656	0.0210302	3.7904	0.335476	0.234167	0.321694	0	0	0.327434	11.345	0	0	0.136612	0	0.0913065	13477.7	164380
A186	10.4071	1.87622	1.13244	3.26373	0	0.0697415	0.0760843	4.09331	0.0515011	4.00195	4.19904	0.477879	0.162194	0	0	0.502859	13.5846	0	0	0	0	0.091734	18789	178394
A187	12.172	1.04154	0.580284	3.62354	0	0.438771	0.122016	3.46173	0	3.26825	1.7229	0	0.231526	0	0	0.286693	10.4213	0	0	0.0990488	0	0.165502	20285.7	180216
A188	11.3633	1.4692	0.64029	3.27981	0	0.128156	0.244669	4.82637	0	5.79305	2.3903	0.131721	0.234178	0	0	0.780443	15.7427	0	0	0.33812	0	0.18964	29467	147324
A190	10.1749	0.622512	0.529877	5.8069	0	0.0848449	0.236545	10.3239	0.146193	7.33887	4.44208	0.232548	0.488601	0	0.304384	0.308635	0.458128	0	0	0.135667	0	0.435938	22404.5	181011
A191	11.0704	3.0925	1.02284	2.80373	0	0.144511	0.113861	5.23544	0.0533576	3.91803	10.1194	0.594126	0.0640156	0	0	0.774439	13.8865	0	0	0.462146	0.0163455	0.00297003	23718.1	185974
A192	12.227	1.95504	0.166411	3.7539	0	0.17764	0.0645987	3.42568	0	3.93799	1.74383	0	0.169678	0	0	0.324538	15.0539	0	0	0.0852141	0	0.115004	16379.2	167653
A193	11.555	1.90261	0.528812	1.85745	0	0.127012	0.0692815	4.4686	0.109425	4.53927	0.914339	0	0.147692	0	0	0.556903	14.148	0.0205193	0	0.223401	0	0.0104415	33218.6	184675
A194	12.4047	3.92223	2.59454	4.61026	0	0.397115	0.233278	4.86404	0.0225579	5.27629	1.91917	0	0.223276	0	0	0.476229	12.0958	0	0	0.0879212	0	0.0226013	30312.8	148632
A196	11.1857	1.11593	0.303958	5.12471	0	0.121676	0.508844	5.05464	0.247094	6.83564	6.45	0.125061	0.212231	0	0	0.841755	12.8845	0	0	0.379391	0	0.0750213	23495	259494
A197	11.0092	1.17138	0.652627	1.85652	0	0.0580556	0.0351864	5.81757	0.0571621	4.65498	2.12766	0	0.0771525	0	0.23803	0.599616	15.3371	0	0	0.427022	0	0.269657	24201.7	202933
A198	12.529	2.20367	1.36896	2.83576	0	0.168616	0.122634	4.09415	0.0155645	4.32237	0.413809	0.519921	0.182066	0	0.518499	0.48056	15.2249	0	0	0.0404425	0	0.0753732	18302.4	143937
A199	11.1125	1.84072	0.560751	2.19363	0	0.132042	0.316912	5.10359	0	5.0984	1.24436	0	0.324631	0	0.162413	0.566094	15.4161	0	0	0.40538	0	0.00325651	21854.5	163788
A200	11.5889	1.91164	0.969376	2.3348	0	0.11087	0.0886993	3.61135	0.0163746	2.92824	0.522418	0.455819	0.279946	0	0	0.332728	12.7713	0	0	0.127643	0	0.0246092	16194.3	279514
A201	11.416	2.11682	0.310901	2.87239	0	0	0.0329149	4.38052	0.11697	3.92154	0.710825	0	0.0601433	0	0	0.357182	13.8203	0	0	0.195386	0	0.030694	11558.3	330013
A203	11.5714	2.54559	0.773851	3.10231	0	0.47086	0.477635	5.26414	0.0732021	6.07001	2.43276	0.305659	0.255238	0	0	0.589185	25.3204	0	0	0	0	0.0519514	21076.6	193356
A205	10.6363	1.18329	1.98343	3.57047	0	0.297741	0.189478	3.3934	0.0549672	3.43423	1.4614	0.204016	0.214327	0	0.0762968	0.536702	12.6977	0	0	0	0	0.211114	18868.1	207814
A206	10.632	1.33327	0.397203	3.60087	0	0.0454292	0.0413007	5.05008	0	5.37465	0.535154	0.933863	0.128292	0	0.0698481	0.743649	11.7607	0	0	0.0871696	0.0154154	0.00840305	35219.6	157177
A207	11.7371	2.92227	0.347447	4.65973	0	0.0505763	0.0643721	8.32895	0.0933712	7.1698	1.68806	0.103967	0.218442	0	0	0.822976	10.6354	0	0	0.0727844	0	0.0966695	26265.7	160811
A208	10.4857	0.60918	0.565667	6.1638	0	0.694414	0.0988133	6.49306	0	6.98693	2.0154	0	0.300925	0	0	0.653081	10.8139	0	0	0.0579322	0	0.163815	29014.5	159966
A209	10.9933	2.34085	0.261312	3.1819	0	0.209209	0.060863	5.11435	0.0308984	3.51931	1.47868	0.0860119	0.264126	0	0	0.415848	11.6981	0	0	0.281001	0	0	27060.7	216824
A210	10.3635	2.96776	0.813976	3.90412	0	0	0.0735461	5.11483	0.0663773	3.58804	3.79424	0	0.231442	0	0.0691009	0.578045	19.4005	0	0	0.689897	0	0.102529	15856	181515
A211	12.3763	1.76339	0.0667104	4.29586	0	0	0	6.29884	0.0394403	4.41509	0.838873	0	0.159699	0	0	0.645297	7.7544	0	0	0	0	0.260149	25826.7	124031
A213	10.0077	2.35701	0.393064	3.05274	0	0.0524485	0	5.65711	0	4.94165	1.44163	0.431262	0.304942	0	0.0806404	0.577477	11.3123	0	0	0	0	0.0970141	15246	249196
A214	11.5667	0.418828	0.0855607	3.39266	0	0.0685007	0.0083034	4.66166	0	4.81187	9.32458	0.938753	0.151723	0	0	0.378221	10.8771	0	0	0.0876261	0	0.0788392	21146.9	178849
A215	11.5103	2.63921	0.370846	2.71206	0	0	0.0166105	5.1682	0.0168654	5.60191	3.85622	0	0.295925	0	0	0.591938	9.38599	0	0	0.0876458	0	0.19151	29690.5	127976
A216	12.6051	1.75965	0.250793	2.7406	0	0.0223097	0.0405646	5.52756	0.329496	5.21183	2.45287	0	0.274247	0	0	0.678223	9.83784	0	0	0	0.0151406	0.00825327	14999.2	201801
A217	9.84724	4.16463	0.899193	4.84289	0	0.166131	0.0302068	6.11019	0.0204468	6.01094	4.24021	0.113836	0.165584	0	0	0.658284	17.2431	0	0	0.106258	0	0.228763	11451.8	281688
A218	12.826	0.289199	0.229753	4.15031	0	1.47154	0	4.73974	0	4.42342	0.103182	0	0.0960335	0	0	0.681065	3.98862	0	0	0.126053	0	0.278672	16832.7	151069
A219	11.6469	1.27861	0.609471	3.42522	0	0.0697069	0.118295	3.87636	0.0171585	5.32076	3.01086	0.382113	0.169834	0	0	0.63845	13.6336	0	0	0.468138	0	0.00573053	24424.1	166464
A220	12.7631	0.442856	0.231972	3.76981	0	0.0557158	0.209364	3.71185	0	2.9525	2.33361	0.152709	0.0740431	0	0	0.412587	7.15336	0	0	0	0	0.013741	11341.3	188994
A221	12.0482	1.05961	0.507752	2.84104	0	0.0213953	0.101145	3.8874	0	3.50765	0.0840119	0.351849	0.127949	0	0.0328956	0.500326	10.2305	0	0	0.348953	0	0	23627.4	182627
A222	11.4127	6.38424	0.696693	5.89921	0	0	0.25963	6.72195	0.0329517	6.12985	1.66455	0	0.326153	0	0	0.839138	6.90702	0	0	0.0428107	0	0.00550254	10246.5	156564
A223	11.4499	3.05127	0.191794	4.07199	0	0.204736	0.00930651	6.26471	0.0188986	5.03245	0.703436	0	0.221067	0	0	0.683248	16.7206	0	0	0	0	0.224065	16992.1	194030
A224	11.3934	4.02947	0.175141	5.00347	0	0.0233699	0.0169969	8.70852	0.0862885	6.46663	3.21179	0	0.372688	0	0	0.660357	16.0399	0	0	0	0	0.253601	20229.9	156921
A225	10.5891	1.8704	0.0707587	4.27487	0	0	0.0309011	7.49516	0.0418337	5.67459	1.55711	0	0.15998	0	0	0.678936	14.1898	0	0	0.244575	0	0.41565	19359.5	168290
A226	11.764	1.44029	0.272436	3.52149	0	0.109057	0.00793172	3.34334	0	4.23359	4.71053	0	0.152177	0	0	0.331537	11.3062	0	0	0.10463	0	0.083379	18726.3	152356
A227	12.3732	0.663899	0.391806	3.45818	0	0.0723885	0.272015	5.50016	0.0178186	5.64811	2.27395	0	0.0881835	0	0.148398	0.836992	5.255	0	0	0.0462997	0	0.0148775	20620.6	153045
A228	12.306	3.58523	0.35297	4.14645	0	0.094197	0.196964	7.21165	0.226072	5.7109	0.369878	0	0.422491	0	0.54311	0.8444	12.6591	0	0	0.0903726	0	0.403648	25209.3	167987
A229	12.3997	1.8038	1.07476	3.50903	0	0.122924	0.125163	4.23949	0.072619	4.44523	0.579213	0.505374	0.318549	0	0.529191	0.536582	11.1508	0	0	0.0943463	0	0.154613	34186.5	162268
A230	13.7402	1.99932	0.253292	3.17321	0	0.380228	0.49777	5.45144	0	5.23936	1.29395	0.20843	0.0926385	0	0.0779474	0.493976	6.58504	0	0	0.121597	0.0516087	0.0218807	22426	294609
A231	13.6978	1.50634	0.181014	3.06601	0	0.144921	0.0175668	3.69437	0	5.73188	0.284528	0	0.104321	0	0	0.555414	14.9692	0	0	0.208557	0	0.07744	35440.3	157330
A232	13.9015	1.38041	1.0916	2.55616	0	0.26704	0.0441403	4.15423	0	5.55626	0.476623	0.099807	0.0967856	0	0	0.733277	8.59317	0	0	0	0	0.029936	25245.7	176751
A234	12.5407	1.42021	0.552625	6.91028	0	0.0663656	0.0160892	6.31413	0.0980163	4.92514	1.56357	0	0.264588	0	0.0340127	0.387987	7.03422	0	0	0.0848949	0.0150131	0.365542	24115.4	175780
A235	11.6653	1.14808	2.52406	6.02556	0	0.393428	0.0260127	7.09518	0.171677	5.9112	1.68529	0.147045	0.392132	0	0.137478	0.561076	9.3128	0.0173346	0	0.205884	0	0.103646	16800.9	238522
A236	13.748	1.18892	0.539732	6.23508	0	0.0240064	0.0436495	7.28026	0.0354554	5.04238	3.58205	0.394788	0.199394	0	0.0738203	0.430395	1.02259	0	0	0.184254	0	0.180579	12800.7	177334
A237	12.6028	2.00814	0.0310783	3.82796	0	0.14929	0.669565	4.03588	0.09187	3.47839	1.27012	0.511477	0.330662	0	0	0.455785	10.554	0	0	0	0	0.162617	18305.1	169930
A238	11.562	1.91199	0.333839	4.0494	0	0.187093	0.0194389	5.58907	0.0197371	5.91038	1.57424	0	0.186476	0	0	0.5521	11.8661	0	0	0.153854	0	0.0889882	32802.2	202128
A239	12.6012	2.3829	0.477247	2.47351	0	0.0254726	0.148209	4.06441	0.0188104	3.74347	1.50033	0	0.228498	0	0	0.511285	9.61261	0	0	0.14663	0	0.348663	20071.8	206630
A240	12.152	4.74339	0.390442	6.30024	0	0.369427	0.0723378	9.04043	0.0839402	9.36046	8.25731	0.350497	0.188826	0	0	0.830672	9.17245	0	0	0.245373	0.192856	0.0770935	30950	199550
A241	11.8434	1.65273	0.0592331	3.3705	0	0	0.137962	4.19071	0	3.04632	0.744848	0	0.17331	0	0	0.346553	10.8115	0	0	0	0	0.0555545	19102.1	353331
A242	11.4166	2.13289	1.13914	2.66747	0	0.0228001	0.116077	6.66589	0.0336738	4.23846	1.16386	0.562427	0.22725	0	0.0350555	0.679801	14.9238	0	0	0.174995	0.0309468	0.314895	26218.3	337065
A243	12.439	1.96826	1.51139	2.71113	0	0	0.547959	4.58567	0.0168596	5.44172	11.1164	0.750912	0.144119	0	0.0702055	0.240253	0.205462	0	0	0.0438078	0	0.0225228	37492.5	243191
A244	13.9708	0.573523	0.887595	5.33745	0	1.84761	0.361782	6.20691	0.0629713	3.74383	0.558069	0	0.17943	0	0	0.814266	5.61061	0	0	0.136353	0.0385811	0.0385566	8925.38	146757
A245	10.8567	2.44638	0.0387411	6.07814	0	0.403215	0.146629	6.35276	0	8.53949	4.50626	0.127518	0.309144	0	0	0.586297	10.979	0	0	0.297572	0	0.0344228	19964.9	151920
A246	11.4813	2.37132	0.0914013	2.93935	0	0.243923	0.354809	4.67367	0	4.9008	1.05358	0	0.170184	0	0	0.537135	11.9415	0	0	0.257421	0	0.0330868	32274.9	148020
A247	10.6722	3.3005	0.405283	3.48555	0	0	0	5.41801	0.0217827	5.95381	1.27409	0.121273	0.225404	0	0	3.04661	1.45117	0	0	0	0	0.276446	26502.3	275851
A248	12.2815	2.17863	0.301737	3.34441	0	0.0805247	0.0878482	3.68431	0.059464	4.5773	6.40289	0	0.140454	0	0	0.0941529	3.11607	0	0	0	0	0.0695084	36107	323834
A249	11.7786	2.39655	0.217592	3.66859	0	0.174206	0.168933	3.875	0.0214406	5.25314	2.62218	0.119369	0.144694	0	0	0.594094	12.7509	0	0	0.278556	0	0.243462	44341.6	153442
A250	10.7702	2.57965	0.57359	4.56672	0	0.0861042	0.18787	5.18642	0.0211947	6.83101	0.788901	0	0.371889	0	0	0.671177	13.5345	0	0	0.165217	0	0.0424712	28143.1	146316
A251	12.1808	0.695778	0.15793	4.18636	0	0.0252881	1.27825	4.82862	0	4.86751	1.19157	0	0.201639	0	0.0777618	0.630783	16.5372	0	0	0	0	0.143445	22964.1	264284
A252	12.5858	3.52375	0.624529	4.83373	0	0.236844	0.047849	7.15481	0.0388665	6.55821	1.03334	0	0.402183	0	0	0.902581	19.2461	0	0	0.10099	0	0.210933	24199.3	152285
A253	9.39558	2.83605	0.160934	5.87891	0	0	0	7.33812	0	7.06501	2.52966	0	0.222597	0	0	0.557412	13.9452	0	0	0	0.0174883	0.152529	27924.2	163987
A254	11.3857	1.25231	0.284255	5.14752	0	0.252864	0.11954	5.21253	0.0560187	5.81957	4.17021	0.103959	0.252031	0	0	0.606101	7.43362	0	0	0.0727792	0	0.0592448	26255.9	144854
A255	11.2058	1.77575	0.15115	3.34121	0	0.217822	0.660089	6.60414	0.107235	5.03043	1.04538	0.497515	0.297513	0	0.111635	0.731044	14.0993	0	0	0.673374	0	0	19592.1	190595
A256	12.8636	3.99826	0.537803	3.14838	0	0.161464	0	4.52501	0.0794894	4.63261	3.90974	0	0.295042	0	0.082751	0.141593	10.123	0	0	0.0774542	0	0.0365029	29885	207360
A257	10.8303	2.20161	0.856681	2.86579	0	0.0244953	0.0178154	5.15465	0	5.06866	1.8275	0	0.146488	0	0.0753237	0.267315	5.86372	0	0	0	0	0.0875973	40920.3	184183
A258	10.6478	4.66436	0.775585	3.39016	0	0.266118	0.301073	6.67159	0.0873406	8.66012	0.232211	0	0.31436	0	0.181849	0.88737	20.862	0	0	0.312049	0	0.142202	24756.8	140966
A259	11.3354	3.14737	0.281077	4.47567	0	0.0562582	0.0204583	5.76137	0.0415443	6.83131	1.98816	0.115647	0.18691	0	0	0.433048	11.4421	0	0	0.107948	0	0.0242809	21623.5	308118
A260	11.3584	3.2017	0	5.17737	0	0.0616057	0.0224028	8.57481	0.0758219	5.88629	3.78983	0.422131	0.245611	0	0.0315732	0.704313	10.1026	0	0	0.0591045	0	0.0455809	14105.6	159226
A261	12.198	0.435044	0.197496	5.26058	0	0	0	5.43239	0	5.08996	0.388044	0	0.203562	0	0	0.285019	16.8738	0	0	0	0	0.126737	22293.2	207598
A262	10.4321	1.44729	0	4.95801	0	0	0	7.17228	0.0563867	5.54903	1.69903	0	0.31288	0	0	0.585282	8.67355	0	0	0.146515	0	0.0376636	21296	115336
A263	12.1875	2.33997	0.325185	3.18296	0	0.104139	0.18935	3.61226	0.038451	3.39896	3.68024	0	0.121095	0	0.0800574	0.375437	2.15551	0	0	0.674397	0	0.00963127	20156.6	181985
A265	14.3848	2.16469	0.141735	2.96051	0	0	0.074277	4.88826	0.0167592	5.01078	0.980266	0.373222	0.0452404	0	0	0.570522	11.2876	0	0	0.0435471	0	0.0895549	28698.9	259069
A266	11.8312	3.53463	0.192553	3.77248	0	0	0.233584	6.90063	0.0189734	6.65832	0.70622	0.316898	0.349986	0	0.118512	0.811126	16.5709	0	0	0.197201	0	0.516438	33531.9	172568
A267	11.1745	1.28041	0.416994	4.97106	0	0	0.0882938	6.5471	0.0672364	4.95818	1.43008	0.124777	0.27225	0	0	0.703814	19.9566	0.029419	0	0	0	0.0112277	14888	165161
A268	11.645	4.09667	3.20292	4.19363	0	0.716897	0.190511	5.82963	0.0203615	4.03622	4.33077	0	0.210697	0	0	0.252543	3.6559	0	0	0.105814	0	0.0680024	17463.3	141864
A269	11.0253	2.4448	1.03059	4.07164	0	0.0423127	0.453916	5.46545	0.0156231	6.16699	2.40913	0.0869799	0.12652	0	0.0975847	1.0307	10.04	0	0	0.507436	0	0.0495684	27222.1	163323
A270	12.1013	2.26512	0.0685528	5.85925	0	0	0.339295	8.1046	0.0607943	6.68981	0.754286	0	0.483213	0	0.210963	0.540121	0.329279	0	0	0	0	0.0676794	38208.6	165973
A272	12.4338	2.18898	0.912606	6.38254	0	0.0730641	0.168275	7.21694	0.0179849	4.94671	3.2515	0.100129	0.16183	0	0	0.759375	12.1862	0	0	0.0934636	0	0.0390424	44805.2	174597
A273	11.4645	1.19322	0.0975032	5.70798	0	0	0.0283872	8.04586	0.115291	8.40865	8.37827	0.320935	0.31122	0	0.120022	0.755541	9.0389	0	0	0.0748927	0	0.0577566	31295.4	145026
A274	13.2672	2.23532	0.717584	3.98189	0	0.313367	0.0379851	5.68793	0	4.68049	7.72468	0.357872	0.185087	0	0	0.298549	6.72642	0.0337505	0	0.0835122	0.0118149	0.062257	28401.8	233542
A275	10.3574	3.59197	0.128735	6.25516	0	0.128833	0.51535	6.49471	0.0761102	15.0158	0.202353	0.423736	0.333863	0	0.0396166	0.878716	12.3516	0	0	0.0741615	0	0.25419	13485.2	242099
A276	12.1137	1.17316	0.307257	3.94282	0	0.0245993	0.420439	6.0217	0.0726622	14.5657	2.12504	0	0.408639	0	0.226931	0.790971	14.5519	0.0238448	0	0.0944024	0	0.0303343	37184	150883
A277	12.6073	0.152869	0.555181	4.22514	0.0698969	0.0555604	0.0101022	6.12124	0	4.15322	2.29074	0.114212	0.129214	0	0	0.508881	11.1668	0	0	0	0	0.267202	29890.1	192280
A279	12.5654	3.98665	1.88179	3.52522	0	0.172887	0.287406	8.51807	0.0729539	5.47587	4.36413	0.101541	0.1477	0	0	0.428358	6.32717	0.287286	0	0.213258	0	0.015228	45541.3	174849
A280	12.427	0.413122	0.225053	4.71663	0	0.0225225	0.0163806	5.91509	0.0332638	4.87642	0.79594	0.0925963	0.0598622	0	0	0.232619	0.148637	0	0	0.151256	0	0.00833197	33731.8	259888
A281	11.2663	2.99796	0.364548	3.06175	0	0.0194574	0.325481	6.26711	0.0718423	3.49117	1.37524	0	0.23272	0	0	0.364007	3.17521	0	0	0.0186674	0	0.100773	23162.1	153099
A282	11.8423	1.28997	0.594217	4.51315	0.0260214	0.24821	0.0300871	4.3185	0.0305488	4.35413	0.812195	0	0.295497	0	0	0.65299	17.1252	0	0	0.0396888	0	0.0765191	31647	165440
A283	10.8939	4.66977	0.529982	2.57515	0	0.0795579	0.00964372	5.62439	0	3.3458	1.24958	0	0.0969172	0	0.122321	0.439273	14.5898	0	0	0.0763279	0	0.248534	22003.2	268271
A284	9.72669	2.0821	0.472603	3.88917	0	0.108106	0.314501	6.66049	0.0798316	4.41836	7.42864	0.333341	0.251416	0	0.0831072	0.337072	3.85909	0.0261975	0	0.103717	0	0.203296	16882.9	179802
A285	11.797	0.158512	0.323817	4.28001	0	0.0576114	0.30378	4.14899	0.0638154	4.42635	5.65549	0.236857	0.114843	0	0	0.66239	10.8359	0	0	0.110545	0.0195491	0.0319692	31107.9	132604
A286	11.9614	1.58811	0.786494	5.66323	0	0.419783	0.353012	6.1191	0	4.95304	2.36949	0	0.348667	0	0	0.465264	12.0416	0	0	0.0755138	0	0.042059	46059.5	171444
A287	12.3511	1.26468	1.97755	6.5876	0	1.04698	0.232155	7.64296	0.0188574	4.23078	2.00543	0	0.279973	0	0.117787	0.612088	10.5252	0.0495058	0	0.0244994	0	0.0283406	27970	173065
A288	14.0581	0.902226	1.43354	4.31595	0	0.273263	0.298115	4.82961	0.0201793	7.73502	1.60951	0	0.236048	0	0	0.159755	0.278707	0	0	0.0524337	0.241086	0	49686.1	137486
A289	11.3924	2.19173	0.837875	2.99208	0	0.14674	0.0152462	4.07198	0.0774008	2.73196	1.56396	0.0861842	0.215903	0	0	0.077617	8.25035	0	0	0.0402235	0	0.043945	34419.2	324390
A290	11.3804	2.48679	0.59417	3.36705	0	0.118925	0.147039	6.82809	0.122949	5.55371	0.466975	0.29336	0.221261	0	0.0365697	0.699893	19.8779	0	0	0.524843	0	0.123186	30915.7	165699
A291	11.5172	1.69165	1.2711	2.99509	0	0.349819	0.439458	4.65407	0.16439	3.49052	7.86708	0	0.380364	0	0.0488957	0.328458	0.381592	0	0	0.0610212	0	0.0627453	42531.7	156990
A292	14.0224	1.86186	0.443744	4.14155	0	0.101505	0.0645961	5.87654	0.0749568	5.54705	0	0.312986	0.219202	0	0	0.454953	17.3407	0	0	0.194767	0	0.0531968	20667.1	309962
A293	12.9016	2.23281	0.0345553	5.11394	0	0	0.291754	7.53994	0	4.29586	4.56255	0	0.284934	0	0	0.398952	1.09546	0	0	0	0	0.637952	21695.6	239224
A294	13.1732	0.969682	0.0825384	5.43752	0	0	0.280354	5.95233	0	5.49699	0.951416	0	0.153681	0	0.169334	0.416371	1.42724	0	0	0	0	0.472624	33554.7	190305
A295	11.424	1.73919	0.220336	5.27561	0	0	0.00801861	5.08452	0	4.415	2.1646	0	0.153845	0	0.0339028	0.511348	12.2106	0	0	0.211552	0	0.326293	20275	248765
A296	10.9362	1.33782	1.73917	4.03376	0	0	0.0241116	4.32603	0	2.74247	6.3787	0.136299	0.264345	0	0	0.303644	10.2632	0	0	0.159032	0.044998	0.0122644	17708.2	308743
A297	12.3345	0.824095	0.45428	4.15496	0	0.0213942	0	3.76705	0.331773	2.43471	2.85625	0	0.120835	0	0.0328939	0.229304	0.808639	0	0	0	0.0580771	0.234799	28025.1	338425
A298	12.8806	2.82844	0.882764	4.86716	0	0	0.140187	5.4867	0.0237229	4.66545	0.756861	0	0.213461	0	0.0987853	0.469524	21.8562	0	0	0	0.0872071	0.352568	30822.9	211478
A299	11.1377	0.250893	0.398642	4.09399	0	0.159578	0.190672	5.60307	0.101007	4.81204	0.447577	0	0.272662	0	0.105152	0.310976	0.437667	0	0	0	0.0464137	0.469464	24749.7	145201
A300	10.6341	1.32758	0.06954	3.85928	0	0.0278372	0	6.01424	0	4.12636	1.96752	0	0.231213	0	0	0.678092	15.7658	0	0	0	0	0.171635	22402.6	160873
A301	11.7251	1.71147	0.669504	2.88001	0	0.0198523	0.0144385	4.02677	0.10262	4.1125	6.85985	1.22428	0.309995	0	0.0610463	0.448768	7.78944	0	0	0.114278	0	0.095474	17512.6	151060
A302	11.538	0.826438	0.236954	3.98116	0	0.165994	0.474285	3.3137	0	2.60276	3.44523	0.584956	0.30726	0	0.0729195	0.466734	11.5665	0	0	0	0	0.152058	24562.6	246685
A303	12.1026	1.23376	0.183778	3.40588	0	0	0.0382181	4.75647	0	1.82621	0.495211	0	0.195533	0	0	0.364552	3.49313	0	0	0	0	0.0103678	8062.58	177454
A304	11.8942	1.67176	0.401785	4.12403	0	0.160837	0.19496	7.06666	0	9.13321	3.57878	0	0.187025	0	0	0.224624	0.691545	0	0	0.23146	0	0.26775	22913.5	277167
A305	12.2131	0.897749	0.389024	4.12536	0	0.0444938	0.0566305	5.35031	0.0164284	4.30012	1.5724	0.182927	0.169998	0	0.171025	0.234108	0.333678	0	0	0.0853748	0	0.0109734	19515.6	132586
A306	10.5932	3.3535	0.794287	2.49543	0	0.238468	0.12526	4.54289	0	3.75312	1.56063	0	0.0352122	0	0	0.464711	21.3492	0	0	0.279627	0	0.00653473	22178.9	192589
A307	10.8038	1.24945	0.292469	2.63983	0	0	0.0696679	7.96035	0.0785965	4.67279	0.752268	0.175031	0.183877	0	0	0.759123	12.771	0	0	0.16338	0	0.204745	30494.4	286325
A308	11.5261	2.89933	0.679679	2.13726	0	0.181386	0.160191	6.32598	0	2.92193	1.01748	0.106533	0.129135	0	0	0.151489	13.3697	0	0	0.099441	0	0.194915	20173.8	195619
A309	12.1507	2.89491	0.226214	6.62902	0	0	0.159946	6.82916	0.0764237	6.88417	0.914338	0.319111	0.146129	0	0.159119	0.786539	4.50152	0	0	0	0	0.035095	12069.5	171568
A311	11.062	0.929359	0.632849	5.70102	0	0.0596077	0.0216763	7.83724	0.0220089	3.83939	3.6279	0	0.237646	0	0.0458238	0.284591	0.482785	0	0	0.0285938	0	0.213162	20811.4	236814
A312	11.8454	0.949667	0.544571	4.41538	0	0.354241	0.0297275	5.38312	0	4.80739	0.106998	0	0.126745	0	0	0.706253	10.2504	0	0	0.026143	0	0.0571235	31113.7	242544
A313	12.5531	2.63753	0.918899	1.66271	0	0.06688	0.109444	6.18631	0	3.75532	0.262614	0	0.166649	0	0	0.410544	12.7798	0	0	0.256659	0	0.16082	26267.3	302310
A314	11.4642	0.68207	0.398106	2.64131	0	0.796819	0.367032	4.6241	0.0588417	3.10552	0.938648	0.218397	0.14119	0	0.204187	0.434781	15.983	0	0	0.0764468	0	0.196517	17817.8	192878
A315	11.7954	0.507764	0.484069	5.35995	0	0	0.0301998	9.79416	0.0408842	5.89761	19.0222	0.682856	0.331092	0	0.0425617	0.598792	1.77706	0	0	0.106233	0	0.0375494	25330.8	238502
A317	11.8721	0.720698	0.0654348	3.81533	0	0.157163	0	4.87176	0.0193431	2.95974	2.15994	0.215381	0.121835	0	0	0.61254	9.90053	0	0	0	0	0.258404	22653.1	168864
A318	13.9808	1.78673	0.722404	2.1546	0	0.821886	0	4.54531	0	8.88726	5.61781	0	0.202266	0	0.187209	0.077116	2.06369	0	0	0	0	0.123872	38741.5	184972
A320	12.0817	1.26432	0.200886	4.08581	0	0.114879	0.142038	4.50095	0.0169667	4.2791	3.15763	0	0.267169	0	0.0353257	0.541764	11.3033	0	0	0.0661291	0.0155927	0.186993	24242	155817
A321	13.0469	0.608217	4.55584	3.70031	0	0.280573	0.0556528	5.6961	0.0753423	3.88699	0.100156	0	0.355917	0	0.117651	0.392675	0.933472	0	0	0.195769	0	0.314531	28982	233473
A323	13.0054	1.10983	0.0944676	2.18261	0	0.0504211	0.0275034	5.90482	0.0372339	3.32632	0.890937	0	0.142389	0	0	0.304598	18.4225	0	0	0.145122	0	0.0808289	34320.9	145807
A325	10.9258	1.06443	0.20134	4.90328	0	0.419106	0.0937893	7.02915	0	11.9378	1.64568	0	0.257062	0	0.0495679	0.841858	4.8935	0	0	0.494881	0	0.0636079	34574.8	157681
A327	11.6551	2.70651	2.22552	3.74569	0	0.194881	0.0607443	4.34102	0.0616763	4.36161	2.07705	0	0.231237	0	0	0.179035	7.6666	0	0	0	0	0.0411968	41800.7	185065
A330	11.3173	2.40185	0.835945	3.62563	0	0.523774	0.232796	6.50785	0	5.29837	3.31353	0.239265	0.270692	0	1.02901	0.640771	14.1932	0	0	0.307088	0	0.118412	17896.4	157058
A331	11.2149	3.05232	0.502859	3.83088	0	0.0805188	0.00976019	7.50995	0.0792796	4.21725	6.95571	0.662071	0.21401	0	0.0412663	0.387044	16.5856	0	0	0	0.0728592	0.0165484	22551.1	160746
A332	11.4228	2.76104	0.940068	3.11707	0	0.331156	0.131372	6.59373	0.355701	3.44342	0.472848	0	0.35007	0	0	0.668803	14.3952	0	0	0.20218	0	0.00371236	20484.3	193256
A336	11.2746	2.65979	0.876382	3.89915	0	0.397596	0.0595351	3.95586	0.0345421	3.39119	2.11224	0.288464	0.24865	0	0.215756	0.483117	31.3749	0	0	0.0448769	0	0.204768	31406.9	199503
A337	11.1306	2.61952	0.428104	4.6615	0	0.228496	0.0311597	6.001	0.0421837	3.97311	3.70105	0.117427	0.351105	0	0.0439145	0.434147	14.0172	0	0	0.191817	0	0.00704416	14780.2	193303
A338	12.0083	1.33102	0.0584751	2.8755	0	0	0.0851225	6.07802	0.0518571	3.42923	2.48169	0	0.0855462	0	0.0359899	0.748099	14.9986	0	0	0	0	0.381019	26140.9	111458
A339	12.1875	1.55642	0.418362	2.28588	0	0	0.235485	4.06454	0	3.50088	0	0.183607	0.17063	0	0	0.409037	10.9318	0	0	0.0642692	0.0303082	0.374482	34011.5	158792
A340	10.9545	1.90518	3.65915	2.47707	0	0.532646	0.174327	5.30522	0	3.59083	2.09151	0	0.176964	0	0.286633	0.736971	21.2669	0	0	0	0	0.403947	16440.2	179661
A341	10.337	2.34022	0.318716	2.5375	0	0	0.120629	5.5382	0.0753721	3.13676	8.51659	0	0.271282	0	0	0.407748	15.2476	0.0247341	0	0	0	0.560087	19820.3	172641
A342	10.6767	2.38899	1.0544	4.90988	0	0.0723569	0.114021	5.74476	0.0534325	4.50592	3.88297	0.09916	0.360593	0	0.0370833	0.643921	21.4884	0.0233792	0	0.0694192	0	0.475871	34467.4	152382
A343	11.9897	2.10615	0.0827417	1.92461	0	1.85483	0.0160597	5.47096	0.0489182	3.18641	0.867054	0	0.220086	0	0.203702	0.395882	10.9559	0	0	0.0847391	0	0.0789646	28936	135428
A344	11.6486	1.40186	0.731859	4.44089	0	0.509508	0.435412	5.68912	0.188125	4.51798	4.70154	0.209473	0.211596	0	0.0783375	0.228366	7.44334	0	0	0.0244411	0.034578	0.10681	29852.5	147186
A345	12.0893	0.598567	1.22279	3.19741	0	0.0543875	0.0692228	3.48561	0	3.84561	8.1153	0.335404	0.117451	0	0.125432	0.471642	7.19492	0	0	0.0260897	0.0553655	0.0368869	26276.1	144151
A346	11.8632	1.24912	0.23198	3.95945	0	0	0	6.05368	0.0609557	3.70506	0.729278	0	0.253674	0	0.0951852	0.611259	17.1969	0	0	0	0	0.320634	40618	153554
A347	10.5549	0.504226	0.280926	3.84467	0	0.0749707	0.0181753	3.45084	0.0922711	2.28671	0.588767	0	0.473251	0	0.153691	0.75971	3.14853	0	0	0	0	0.400612	15158.2	191359
A349	11.5503	1.62386	0.167541	4.00171	0	0.107308	0.00975563	8.17112	0.0198106	5.68753	0.421361	0	0.222823	0	0.164988	0.397319	9.59262	0	0	0	0.0182063	0.00992441	18059.8	172585
A350	12.5973	0.698478	0.175232	2.49718	0	0.0200418	0	4.57502	0.0296	2.51931	1.41655	0.0823976	0.186441	0	0	0.351506	4.53311	0	0	0	0.0136015	0.402842	29906.3	172954
A351	12.6654	0.958196	0.40153	4.39565	0	0.0803671	0.0730636	5.43601	0	5.729	2.91905	0	0.206931	0	0	0.434605	7.93163	0	0	0.231313	0	0.0396414	35735.1	173535
A352	11.5735	1.0675	0.346152	5.88474	0	0.16628	0.0705454	5.37408	0.0409302	6.38132	3.04697	0.113937	0.119695	0	0.0426096	0.45905	14.6315	0	0	0.0797644	0	0.0205045	29561.3	155378
A353	11.957	1.72361	1.11193	3.544	0	0.173098	0.125894	4.00284	0.091304	5.22544	0.873894	0.20333	0.123234	0	0	0.713197	12.8627	0	0	0.118622	0	0.192108	28882.3	264907
A355	11.5987	2.00591	0.178165	4.93689	0	0	0.0172904	5.83524	0.0175557	5.7021	1.1202	0	0.181663	0	0	0.639329	7.8589	0	0	0.091233	0	0.216937	30966.2	174295
A356	10.5763	1.53721	0.25462	5.97557	0	0.203851	0.164734	6.71183	0.0334523	5.81211	4.53589	0.372484	0.180604	0	0.243774	0.450219	0.434849	0	0	0.173844	0.0307432	0.201101	20036.9	288585
A357	11.2011	2.36753	0.474169	5.43328	0	0.0759249	0.35893	6.16181	0.0373782	4.69595	1.2919	0	0.470866	0	0.116736	0.66581	8.86736	0	0	0.0971232	0	0.0873839	15459.4	182432
A358	13.1327	1.37985	0.201345	3.39466	0	0	0.0586197	4.92585	0.0793589	15.8212	1.37144	0	0.196372	0	0.454383	0.418845	2.0793	0	0	0.103103	0	0.13252	21887.1	125295
A359	11.7619	0.817115	0.752799	4.00079	0	0	0	2.54506	0	1.25642	1.44053	0.107733	0.47883	0	0	0.577037	5.61253	0	0	0	0	0.875693	15923.5	166646
A360	11.6661	1.93844	0.114782	4.36766	0	0.229738	0.0334176	3.77955	0.271443	7.18782	9.02101	0.566712	0.244247	0	0	0.510377	1.92965	0	0	0.176329	0.0311826	0.504271	11825.4	213502
A361	11.9997	2.99167	0.425681	4.59952	0	0.0486863	0.141638	5.79816	0.0359528	4.51687	0.191174	0.100082	0.24263	0	0.0748559	0.588236	11.0704	0	0	0.116774	0	0.00600368	20023.3	152126
A362	12.094	3.37176	0.538128	3.94835	0	0.14361	0.167116	8.46365	0.06363	7.07153	0.112781	0	0.467581	0	0.706568	0.783603	15.6638	0	0	0.248003	0	0.517104	24385.7	171785
A363	12.278	0.457548	0.481515	6.61934	0	0.0226768	0.0494784	5.46119	0.0334917	5.90804	3.82888	0	0.158215	0	0.0697318	0.54797	7.72766	0	0	0.0435122	0	0.0391489	23316.4	247967
A365	10.6713	0.996505	0.363521	4.51726	0	0.0194026	0	3.1087	0.0429839	2.11615	1.37137	0	0.0838009	0	0	0.510442	11.3962	0	0	0	0	0.435453	14561.5	180966
A366	10.1468	1.58006	0.034708	6.16059	0	0.166725	0.0505246	7.05	0.143639	6.26358	6.54671	0.685455	0.360049	0	0	0.763524	25.4737	0	0	0	0.0377163	0.133637	20238.1	154263
A367	12.0051	2.39284	1.07349	3.17811	0	0.199515	0.145107	4.17263	0.034	3.92577	2.89265	0.378583	0.23965	0	0.188774	0.586195	13.9128	0	0	0.0588969	0	0.0624535	15493.3	208053
A368	11.7821	2.55546	0.420036	3.82192	0	0.0480407	0.288254	3.80889	0.053214	3.59389	0.565917	0	0.263354	0	0.110795	0.514903	11.1542	0	0	0.0460903	0	0.0355444	19632.1	199210
A369	11.7023	0.342291	0.932336	3.09743	0	0	0.00848254	2.03435	0	1.0241	3.11418	0	0.178245	0	0	0.427292	6.19962	0	0	0.313308	0	0.00862929	8680.21	329502
A370	10.91	4.72256	0.418059	3.31338	0	0.28321	0.0561758	4.14212	0.133088	2.26666	1.31426	0.211701	0.2224	0	0.118756	0.612109	7.42983	0	0	0.296413	0	0.561952	16309.3	196618

## Sheet: Table S3
Supplementary Table 3. Primers for qRT-PCR used in this study.
Primer name	Primer sequence (5'to3')
Zm00001d002625-F	GCCTCCAATCAACTCACTTATCCG
Zm00001d002625-R	TTAGTCCTGTCCCACCCCTTCC
Tubulin-F	GTGTCCTGTCCACCCACTCTCT
Tubulin-R	GGAACTCGTTCACATCAACGTTC
zp27-F	TCGCCTCAGTGCCAGTCGTT
zp27-R	GCCGTCAGTTGCTGCGCTAT
Zm00001d002616-F	GAGCAGTTGGCGGAGTTGGA
Zm00001d002616-R	AGCAGAATGGCAGGGGGAGA
Zm00001d002621-F	TATGGTTGGAAAAGCAGACGA
Zm00001d002621-R	CAGGTTGGAAACACTGAGGTG
Zm00001d002624-F	CAAACTAGCCAACACTTCAC
Zm00001d002624-R	CAATCACATCCTCCTCCA
Tubulin was used as the reference gene and an internal control to normalize the data

## Sheet: Table S4
Supplementary Table 4. Primers used to amplify promoter regions of Zm00001d002625
Primer name	Primer sequence (5'to3')
Zm00001d002625-Promoter-F	CTGCTACACCCCCCATTGTA
Zm00001d002625- Promoter-R	TCCTTGTGCGGCACGTT

## Sheet: Table S5
Supplementary Table 5. The phenotypic data and the genotype information for the MK1131 locus
RILs	2018GZL	2019GZL	2018HEB	PC_BLUE	MK1131
JY001	11.6865	12.831	12.6835	12.8653	BB
JY002	10.6483	10.4193	11.2767	9.99954	BB
JY003	12.2073	10.4197	10.4808	10.3946	BB
JY004	11.2598	11.8863	NA	11.3994	AA
JY005	11.2048	11.17	12.2698	11.3728	BB
JY006	NA	NA	NA	NA	BB
JY007	NA	11.9673	NA	12.0496	AA
JY008	12.6265	12.3903	12.5668	13.0768	BB
JY009	13.2547	13.9867	NA	14.8502	AA
JY010	13.5158	12.1	NA	13.4902	AA
JY011	13.2658	14.5163	11.2645	13.853	AA
JY012	10.551	10.516	11.2775	10	BB
JY013	NA	9.06733	NA	7.50768	AA
JY014	12.0785	11.4887	NA	11.7522	BB
JY015	12.4083	10.9043	10.516	10.8111	BB
JY016	12.414	13.1777	12.478	13.3532	AA
JY017	11.253	9.7385	10.7927	9.65058	AA
JY018	11.1905	10.7183	9.86083	9.59596	AA
JY019	10.0725	9.74573	10.0964	8.54506	BB
JY020	10.154	10.73	10.987	9.71785	BB
JY021	11.1992	10.26	NA	9.98516	AA
JY022	12.7705	12.7643	NA	13.4154	BB
JY023	NA	17.0507	11.8157	14.4296	AA
JY024	9.5856	9.7949	10.5495	8.57539	AA
JY025	NA	11.388	12.2538	11.8234	AA
JY026	NA	11.5283	NA	11.362	AA
JY027	10.776	11.496	12.8872	11.7017	BB
JY028	NA	12.4867	NA	12.8629	BB
JY029	11.0687	10.6753	8.9805	8.95018	BB
JY030	12.1372	NA	NA	12.3173	BB
JY031	10.6652	11.6193	10.4198	10.1643	BB
JY032	10.0596	11.2633	10.9162	9.92298	BB
JY033	13.2683	NA	12.6677	13.7953	BB
JY034	11.9015	11.6417	11.7257	11.7033	AA
JY035	11.0075	NA	NA	10.542	BB
JY036	11.2105	13.0367	10.6557	11.4413	BB
JY037	13.4703	14.07	12.979	14.7865	BB
JY038	10.2835	10.5447	9.80245	8.93962	AA
JY039	12.3688	10.8027	12.0802	11.7094	BB
JY040	11.6445	11.3077	NA	11.2405	BB
JY041	12.4262	12.5363	NA	12.9326	AA
JY042	11.3138	11.3067	NA	10.9594	BB
JY043	NA	NA	NA	NA	BB
JY044	12.372	12.2517	NA	12.6481	BB
JY045	10.5436	11.987	9.76533	9.89668	BB
JY046	12.1028	12.1733	12.5062	12.6137	AA
JY047	11.8023	11.329	12.3812	11.8767	AA
JY048	11.8163	NA	13.166	12.9741	-
JY049	12.175	13.9053	13.363	14.1899	AA
JY050	12.1333	12.6543	13.553	13.5639	AA
JY051	11.4518	11.52	NA	11.2551	BB
JY052	NA	11.5213	13.5132	13.0292	BB
JY053	12.0813	11.911	11.9815	12.1216	BB
JY054	10.4957	12.961	11.5992	11.579	AA
JY055	13.6075	14.2843	14.2592	15.7903	AA
JY056	13.1913	13.0197	12.1888	13.5264	AA
JY057	11.7033	11.548	NA	11.4917	BB
JY058	NA	13.8283	NA	14.9642	AA
JY059	11.3733	11.3553	12.4452	11.6861	AA
JY060	11.6195	11.0243	NA	10.9818	-
JY061	13.517	14.1243	NA	15.1878	AA
JY062	14.0505	13.204	12.6315	14.4022	BB
JY063	11.2852	10.627	10.8142	10.1946	BB
JY064	10.573	10.9727	11.902	10.6669	BB
JY065	10.8767	11.0167	10.2134	9.80893	AA
JY066	12.5885	10.9727	NA	11.7597	BB
JY067	10.0428	10.002	10.1412	8.70105	AA
JY068	12.4657	12.4187	NA	12.8675	BB
JY069	12.8217	NA	NA	13.393	BB
JY070	13.1713	12.164	14.378	14.3926	AA
JY071	10.2052	NA	NA	9.28135	BB
JY072	NA	13.8033	12.6308	14.224	AA
JY073	NA	NA	NA	NA	AA
JY074	11.053	10.3843	NA	9.96543	AA
JY075	11.2895	11.5343	11.423	11.1012	BB
JY076	13.482	12.694	11.545	13.0964	AA
JY077	11.0708	12.391	10.4053	10.8323	BB
JY078	11.114	10.49	NA	10.1057	BB
JY079	11.6815	10.5213	10.679	10.2761	BB
JY080	11.245	11.4223	10.8275	10.6382	AA
JY081	12.3692	12.1363	14.207	13.8101	AA
JY082	12.4492	12.9927	11.4213	12.6051	AA
JY083	12.8005	13.7057	13.2517	14.3635	AA
JY084	NA	NA	10.8643	10.3169	BB
JY085	11.725	11.6857	13.8323	12.9465	BB
JY086	10.232	11.288	10.6687	9.88099	AA
JY087	NA	NA	NA	NA	AA
JY088	11.0318	10.803	9.66548	9.43147	BB
JY089	11.637	11.637	10.994	11.0908	AA
JY090	11.7455	11.7363	12.4545	12.1248	BB
JY091	11.8183	NA	NA	11.8161	AA
JY092	NA	11.975	NA	12.0616	BB
JY093	11.1173	9.59273	11.2438	9.77119	BB
JY094	10.9335	11.4517	NA	10.7587	BB
JY095	11.3178	11.5757	NA	11.1882	AA
JY096	11.0192	10.1418	9.9444	9.2179	BB
JY097	12.115	10.2537	NA	10.7558	AA
JY098	9.98612	10.0288	10.1707	8.70253	BB
JY099	12.2348	12.831	12.1792	12.8637	AA
JY100	NA	NA	NA	NA	BB
JY101	10.879	12.8803	NA	11.9098	AA
JY102	11.8097	10.4117	10.766	10.3408	AA
JY103	11.8023	12.4717	NA	12.3497	AA
JY104	12.058	11.8853	10.6255	11.2444	AA
JY105	12.0685	11.374	13.8537	12.9772	BB
JY106	11.2223	10.4127	11.5418	10.4905	AA
JY107	12.0405	13.0253	NA	13.0156	BB
JY108	11.6382	12.12	13.316	12.8239	AA
JY109	13.5925	13.1387	14.4422	15.236	AA
JY110	NA	NA	NA	NA	AA
JY111	11.7595	12.444	NA	12.2903	AA
JY112	12.098	12.2083	NA	12.3796	AA
JY113	11.5092	11.231	11.9475	11.3807	AA
JY114	NA	NA	NA	NA	BB
JY115	11.88	10.296	11.6025	10.8382	AA
JY116	12.1668	13.1767	12.724	13.365	AA
JY117	11.488	NA	10.9262	10.7632	BB
JY118	NA	NA	10.5427	9.8117	AA
JY119	NA	NA	NA	NA	AA
JY120	11.0678	10.246	NA	9.86199	BB
JY121	NA	12.0843	NA	12.2328	BB
JY122	11.0143	11.2753	11.7665	11.0093	-
JY123	12.5527	11.2593	NA	11.9696	-
JY124	13.0025	13.232	13.6497	14.4555	AA
JY125	NA	11.963	NA	12.0428	BB
JY126	11.6203	12.382	NA	12.1203	BB
JY127	10.7705	10.2447	NA	9.60899	BB
JY128	9.98847	9.12263	NA	8.00597	AA
JY129	14.3885	12.3197	NA	14.4138	AA
JY130	12.1695	10.6897	NA	11.1674	AA
JY131	12.296	12.067	13.7185	13.4223	BB
JY132	12.216	13.5213	NA	13.58	AA
JY133	11.894	12.734	12.1523	12.5956	BB
JY134	12.6397	NA	10.6073	11.4801	AA
JY135	12.766	12.8113	NA	13.451	BB
JY136	10.8165	9.01063	10.4832	8.78712	AA
JY137	NA	14.383	NA	15.8329	BB
JY138	10.6807	NA	NA	10.0286	BB
JY139	11.724	11.4333	11.1747	11.1365	AA
JY140	11.3477	11.1563	NA	10.8622	BB
JY141	NA	11.158	NA	10.782	BB
JY142	10.6553	10.7573	10.0185	9.41048	BB
JY143	NA	12.698	NA	13.1939	AA
JY144	11.2048	11.784	12.574	11.9172	BB
JY145	12.3703	12.4437	NA	12.8075	BB
JY146	14.2587	14.584	NA	16.2016	BB
JY147	10.6382	9.91403	10.3317	9.11085	BB
JY148	11.3343	10.3416	NA	10.168	BB
JY150	10.8268	10.3783	NA	9.76868	AA
JY151	12.529	12.8753	11.638	12.7189	BB
JY152	11.4615	11.717	NA	11.4285	BB
JY153	13.2468	13.4473	NA	14.3914	BB
JY154	11.9015	11.8897	NA	11.946	AA
JY155	11.5147	11.9513	NA	11.67	BB
JY156	12.4322	12.0257	11.4187	12.0365	AA
JY157	11.6835	14.6253	NA	14.054	AA
JY158	11.9775	10.2121	NA	10.6045	BB
JY159	11.9667	12.0647	NA	12.148	BB
JY160	12.2933	12.7723	12.593	13.1224	AA
JY161	11.736	12.782	12.273	12.6084	BB
JY162	11.9095	13.5653	14.2942	14.4249	BB
JY163	12.8117	12.2397	11.1337	12.1988	-
JY164	10.8268	11.2827	11.223	10.5657	BB
JY165	11.5482	11.4603	NA	11.2869	BB
JY166	12.9232	11.3753	10.3691	11.2857	AA
JY167	NA	11.5993	11.8908	11.6903	BB
JY168	12.0365	NA	NA	12.159	BB
JY169	11.328	12.048	NA	11.5927	BB
JY170	11.3488	11.782	NA	11.3874	BB
JY171	12.0065	12.0117	NA	12.1372	BB
JY172	13.0433	13.449	12.11	13.6397	AA
JY173	11.1423	10.8273	11.1593	10.4442	AA
JY174	12.0303	11.808	12.167	12.1492	AA
JY175	13.5505	13.5397	14.6628	15.5811	AA
JY176	11.7735	10.2283	10.2088	9.86545	BB
JY177	11.917	NA	NA	11.9712	BB
JY178	11.3535	11.393	11.6188	11.179	AA
JY179	11.837	11.1167	10.3268	10.4877	BB
JY180	12.0403	12.999	NA	12.9933	BB
JY181	10.9367	10.6337	10.7885	9.98265	AA
JY182	12.8987	11.8773	NA	12.7807	AA
JY183	13.1997	13.1163	NA	14.0742	BB
JY184	12.4095	12.03	11.4725	12.0596	AA
JY185	NA	14.44	NA	15.9222	AA
JY186	14.098	13.6697	NA	15.2991	AA
JY187	14.8855	12.6297	NA	15.0948	AA
JY188	12.0625	10.549	11.55	11.0557	AA
JY189	10.951	11.0857	9.59367	9.50316	BB
JY190	11.2515	11.5293	11.7178	11.2611	AA
JY191	12.037	11.7157	11.4885	11.675	AA
JY192	14.186	13.284	NA	15.0504	AA
JY193	12.8387	12.8693	NA	13.5613	AA
JY194	11.3315	11.047	NA	10.7568	AA
JY195	12.241	13.8533	NA	13.8794	BB
JY196	11.0282	13.403	12.299	12.577	BB
JY197	13.6935	NA	NA	14.7629	AA
JY198	11.1122	11.711	NA	11.1275	BB
JY199	10.8605	9.94787	NA	9.43652	AA
JY200	NA	NA	NA	NA	BB
JY201	11.9622	NA	NA	12.0423	AA
JY202	NA	NA	NA	NA	AA
JY203	12.4102	NA	NA	12.7463	BB
JY204	11.1538	11.1537	NA	10.6956	BB
JY205	11.3545	11.7823	12.768	12.1236	AA
JY206	13.5985	NA	NA	14.6136	-
JY207	NA	11.7223	NA	11.6659	BB
JY208	10.2345	9.6288	11.719	9.58378	BB
JY209	14.3057	13.5663	NA	15.3885	AA
JY210	12.665	13.142	NA	13.6425	AA
JY211	10.0046	11.9487	11.1765	10.4494	AA
JY212	NA	NA	NA	NA	BB
JY213	11.0653	10.5817	10.7622	10.0099	BB
JY214	11.481	11.0313	11.5843	11.022	AA
JY215	11.1655	10.298	10.7615	9.90335	BB
JY216	9.67495	10.988	NA	9.30361	AA
JY217	11.9437	10.9627	10.9005	10.8194	BB
JY218	11.9258	11.8303	NA	11.9168	BB
JY219	11.748	13.0707	NA	12.8057	AA
JY220	12.771	12.999	NA	13.6125	AA
JY221	10.8995	NA	NA	10.3723	BB
JY222	12.3127	12.8603	NA	13.108	BB
JY223	NA	12.2503	NA	12.4928	AA
JY224	13.7583	13.4997	NA	14.8687	AA
JY225	10.5762	9.30053	NA	8.65314	BB
JY226	11.1003	11.8333	10.8198	10.7873	AA
JY227	10.0487	9.97893	9.61335	8.3606	BB
JY228	11.2417	10.12	11.3	10.1816	AA
JY229	NA	12.053	12.2825	12.4193	AA
JY230	11.148	11.1573	10.7523	10.3828	AA
JY231	10.4968	NA	NA	9.73942	AA
JY232	12.9938	13.639	NA	14.3376	BB
JY233	11.1527	NA	9.61218	9.34313	BB
JY234	12.049	10.5173	NA	10.9209	AA
JY235	11.5028	12.7203	NA	12.3043	BB
JY236	11.235	13.5907	NA	12.8068	AA
JY237	10.5091	10.498	12.1073	10.4852	AA
JY238	11.508	11.5387	NA	11.3184	AA
JY239	13.6143	12.4433	12.957	13.9177	BB
JY240	11.1175	13.0397	11.1463	11.697	BB
JY241	11.4142	12.184	NA	11.7798	BB
JY242	10.5862	11.864	11.898	11.1857	BB
JY243	10.65	10.0123	11.5	9.90577	AA
JY244	NA	11.275	NA	10.9653	BB
JY245	13.5635	13.5897	12.8778	14.4996	AA
JY246	12.2308	12.3223	11.4485	12.1106	AA
JY247	11.8325	11.616	9.65725	10.3537	AA
JY248	12.7948	13.1553	NA	13.7637	AA
JY249	11.4655	11.4037	13.0493	12.145	BB
JY250	13.997	12.9187	14.6143	15.4487	AA
JY251	12.7462	12.824	NA	13.4449	BB
JY253	13.6233	11.9757	13.385	13.9213	BB
JY254	NA	NA	NA	NA	AA
JY255	12.258	11.7033	NA	12.0919	AA
JY256	10.7084	9.5245	NA	8.95282	BB
JY257	12.1555	12.6053	12.9217	13.1531	BB
JY258	11.2312	10.7493	9.8507	9.63083	BB
JY259	12.9563	11.7803	NA	12.7482	AA
JY260	NA	NA	NA	NA	BB
JY261	10.8965	10.0389	10.8935	9.68254	BB
JY262	10.7432	NA	10.9808	10.1689	BB
JY263	11.3138	10.638	9.67267	9.50246	BB
JY264	10.9325	10.0631	NA	9.59407	BB
JY265	15.516	12.515	14.401	15.9528	AA
JY266	12.6412	11.5877	12.0965	12.3282	AA
JY267	13.409	13.4107	NA	14.4982	AA
JY268	13.7867	12.8723	NA	14.3671	BB
JY269	11.4473	10.3003	13.281	11.6438	BB
JY270	11.8038	NA	NA	11.7933	AA
JY271	11.409	12.2147	NA	11.8011	BB
JY272	11.6777	10.0107	NA	10.1817	BB
JY273	12.2997	13.0717	12.8805	13.4787	AA
JY274	11.4797	11.5297	12.5623	11.9209	BB
JY275	12.7257	11.818	12.7227	12.9015	AA
JY279	NA	11.4983	10.6792	10.5539	BB
JY280	12.3153	11.4477	NA	11.9262	BB

## Sheet: Table S6
Supplementary Table 6. Summary of categorized SNPs between Ji846 and Ye3189
Category	aNo. SNPs
Total	18192527
Upstream	454253
Exon stop gain	4460
Exon stop loss	614
Exon synonymous	162955
Exon missense	177806
Intronic	955202
Splicing	1710
Downstream	441216
Upstream/Downstream	21436
Intergenic	15972875
Ts	13081877
Tv	5110650
Ts/Tv	2559
aNo. SNPs indicates the number of SNPs on chromosomemes

## Sheet: Table S7
Supplementary Table 7. Genes located in the MK1130–MK1132 (Chr2:16.80 Mb to 17.25 Mb) interval and known genes that were identified and associated with PC traits in this study
Gene ID	Chr.a	Pos. startb	Pos. endc	rd	Pe	Annotation
Zm00001d027597	1	18299864	18321135	-0.09	9.11E-02052	MADS-box transcription factor 47
Zm00001d020591	7	123954263	123955189	0.24	6.21e-06	gz50 – 50-kDa gamma zein
Zm00001d020592	7	123982344	123983015	-0.1	0.0556	zp27 - 27-kDa zein protein
Zm00001d002615	2	16782263	16790203	-0.13	0.0181	N/A
	2
Zm00001d002616	2	16820816	16824368	-0.11	0.0379	OSJNBa0019K04.3-like protein
Zm00001d002617	2	16872323	16895026	0.05	0.398	N/A
Zm00001d002618	2	16960148	16960816	0	0.975	Dehydration-responsive element-binding protein 1D
Zm00001d002620	2	16974028	16974666	-0.04	0.426	AP2-EREBP-transcription factor 68
Zm00001d002621	2	16980363	16988258	-0.14	0.00801	N/A
Zm00001d002623	2	17058294	17060000	0.03	0.535	Multidrug and toxic compound extrusion protein
Zm00001d002624	2	17074071	17087531	-0.15	0.00603	N/A
Zm00001d002625	2	17149611	17153983	-0.22	3.36e-05	N/A
Zm00001d002626	2	17190893	17193599	0.1	0.0621	IDP650
Zm00001d002628	2	17231899	17234633	0	0.925	Ribosomal protein L15
Zm00001d002629	2	17326658	17330523	0.08	0.131	N/A
aChr, chromosome.
bPos. start, the start position of the gene.
cPos. end, the end position of the gene.
dr, the correlation coefficient between gene expression levels and BLUE value of protein content in maize inbred lines.
eP, P value of the correlation between gene expression levels and BLUE value of protein content in maize inbred lines.

## Sheet: Table S8
Supplementary Table 8. Promoter region binding element prediction of Ji846
Matrix ID	Family	Position	Strand	Similar Score	Hit Sequence	TF ID or Motif name
TFmatrixID_0059	ERF;AP2	346	+	0.99	aCGCCGacaa	AC198979.4_FG009;GRMZM2G002119;GRMZM2G020016;GRMZM2G020054;GRMZM2G020150;GRMZM2G023708;GRMZM2G047999;GRMZM2G066158;GRMZM2G068967;GRMZM2G076896;GRMZM2G079653;GRMZM2G079825;GRMZM2G089995;GRMZM2G131281;GRMZM2G132185;GRMZM2G132223;GRMZM2G138396;GRMZM2G142179;GRMZM2G146028;GRMZM2G149756;GRMZM2G174347;GRMZM2G307665;GRMZM2G309731;GRMZM2G310368;GRMZM2G328197;GRMZM2G369472;GRMZM2G429378;GRMZM2G438202;GRMZ…
TFmatrixID_0070	ERF;AP2	317	-	0.99	cGTCGGctt	GRMZM2G000520;GRMZM2G041839;GRMZM2G047918;GRMZM2G048621;GRMZM2G056729;GRMZM2G072926;GRMZM2G172936;GRMZM2G368838;GRMZM2G477287
TFmatrixID_0070	ERF;AP2	346	+	1	acgCCGACa	GRMZM2G000520;GRMZM2G041839;GRMZM2G047918;GRMZM2G048621;GRMZM2G056729;GRMZM2G072926;GRMZM2G172936;GRMZM2G368838;GRMZM2G477287
TFmatrixID_0079	ERF	1150	+	0.99	gaGCCGCcag	AC198979.4_FG009;AC233933.1_FG001;GRMZM2G021790;GRMZM2G024871;GRMZM2G055180;GRMZM2G060206;GRMZM2G060517;GRMZM2G073258;GRMZM2G080516;GRMZM2G123119;GRMZM2G317596;GRMZM2G379652;GRMZM2G381441;GRMZM2G466044;GRMZM2G474326;GRMZM2G478965
TFmatrixID_0080	ERF;AP2	346	+	0.99	acgCCGACaa	AC187157.4_FG001;AC198403.3_FG001;AC233944.1_FG002;GRMZM2G005301;GRMZM2G028969;GRMZM2G041839;GRMZM2G047918;GRMZM2G048621;GRMZM2G056729;GRMZM2G072926;GRMZM2G073047;GRMZM2G172936
TFmatrixID_0082	ERF;AP2	346	+	1	aCGCCGaca	AC198979.4_FG009;GRMZM2G016434;GRMZM2G018984;GRMZM2G020150;GRMZM2G021790;GRMZM2G024871;GRMZM2G025062;GRMZM2G053503;GRMZM2G055180;GRMZM2G055204;GRMZM2G057386;GRMZM2G076896;GRMZM2G080516;GRMZM2G087059;GRMZM2G100727;GRMZM2G138396;GRMZM2G149756;GRMZM2G169382;GRMZM2G174347;GRMZM2G175525;GRMZM2G307665;GRMZM2G309731;GRMZM2G317596;GRMZM2G381441;GRMZM2G425798;GRMZM2G457562;GRMZM2G466044;GRMZM2G474326;GRMZ…
TFmatrixID_0085	ERF;AP2	315	-	0.98	ctcGTCGGct	AC198403.3_FG001;GRMZM2G028969;GRMZM2G041839;GRMZM2G042756;GRMZM2G047918;GRMZM2G048621;GRMZM2G056729;GRMZM2G072926;GRMZM2G073047;GRMZM2G137341;GRMZM2G172936;GRMZM2G368838;GRMZM2G380377;GRMZM2G424348
TFmatrixID_0085	ERF;AP2	347	+	0.99	cgCCGACaat	AC198403.3_FG001;GRMZM2G028969;GRMZM2G041839;GRMZM2G042756;GRMZM2G047918;GRMZM2G048621;GRMZM2G056729;GRMZM2G072926;GRMZM2G073047;GRMZM2G137341;GRMZM2G172936;GRMZM2G368838;GRMZM2G380377;GRMZM2G424348
TFmatrixID_0086	ERF;AP2	316	-	0.97	tcGTCGGctt	AC198403.3_FG001;GRMZM2G028969;GRMZM2G041839;GRMZM2G042756;GRMZM2G047918;GRMZM2G048621;GRMZM2G056729;GRMZM2G072926;GRMZM2G073047;GRMZM2G137341;GRMZM2G172936;GRMZM2G368838;GRMZM2G380377;GRMZM2G424348
TFmatrixID_0086	ERF;AP2	346	+	0.98	acgCCGACaa	AC198403.3_FG001;GRMZM2G028969;GRMZM2G041839;GRMZM2G042756;GRMZM2G047918;GRMZM2G048621;GRMZM2G056729;GRMZM2G072926;GRMZM2G073047;GRMZM2G137341;GRMZM2G172936;GRMZM2G368838;GRMZM2G380377;GRMZM2G424348
TFmatrixID_0088	ERF;AP2	347	+	0.95	cgCCGACa	AC187157.4_FG001;AC233944.1_FG002;GRMZM2G005301;GRMZM2G028969;GRMZM2G041839;GRMZM2G047918;GRMZM2G048621;GRMZM2G056729;GRMZM2G072926;GRMZM2G073047;GRMZM2G172936;GRMZM2G368838
TFmatrixID_0092	ERF	1150	+	1	gagCCGCCa	GRMZM2G057386;GRMZM2G466044;GRMZM2G474326
TFmatrixID_0093	Dof	1164	-	0.99	gcgCTTTAagt	P38564
TFmatrixID_0094	Dof	44	+	0.99	tatAAAAGgga	O24463
TFmatrixID_0102	ERF;AP2	1149	+	1	cgaGCCGCca	AC198979.4_FG009;GRMZM2G016434;GRMZM2G018984;GRMZM2G020150;GRMZM2G021790;GRMZM2G024871;GRMZM2G025062;GRMZM2G055180;GRMZM2G055204;GRMZM2G057386;GRMZM2G076896;GRMZM2G080516;GRMZM2G087059;GRMZM2G100727;GRMZM2G138396;GRMZM2G149756;GRMZM2G174347;GRMZM2G175525;GRMZM2G307665;GRMZM2G309731;GRMZM2G317596;GRMZM2G381441;GRMZM2G425798;GRMZM2G457562;GRMZM2G466044;GRMZM2G474326;GRMZM2G475678
TFmatrixID_0109	ERF	316	-	0.9	tcGTCGGctt	GRMZM2G042756;GRMZM2G137341;GRMZM2G380377
TFmatrixID_0109	ERF	346	+	0.99	acgCCGACaa	GRMZM2G042756;GRMZM2G137341;GRMZM2G380377
TFmatrixID_0118	ERF	347	+	0.92	cgCCGACa	GRMZM2G073047;GRMZM2G119865;GRMZM2G301860
TFmatrixID_0119	AP2;ERF	346	+	0.89	acgCCGACaa	AC233944.1_FG002;GRMZM2G005301;GRMZM2G028969;GRMZM2G047918;GRMZM2G056729;GRMZM2G072926;GRMZM2G073047;GRMZM2G119865;GRMZM2G301860
TFmatrixID_0121	ERF;AP2; ERF;bHLH	347	+	0.94	cgCCGACa	AC187157.4_FG001;AC233944.1_FG002;GRMZM2G005301;GRMZM2G028969;GRMZM2G041839;GRMZM2G047918;GRMZM2G048621;GRMZM2G056729;GRMZM2G072926;GRMZM2G073047;GRMZM2G119865;GRMZM2G172936;GRMZM2G301860;GRMZM2G368838;GRMZM2G421033;GRMZM2G174917
TFmatrixID_0129	AT-Hook	488	+	1	gaaaAAATT	GRMZM2G004878;GRMZM2G106133
TFmatrixID_0131	AT-Hook	825	-	1	TTTATtcat	GRMZM2G089562;GRMZM2G106133;GRMZM2G123887;GRMZM2G159926;GRMZM2G164489
TFmatrixID_0133	AT-Hook	485	+	1	ggggAAAAA	GRMZM2G008456;GRMZM2G127034
TFmatrixID_0133	AT-Hook	486	+	1	gggaAAAAA	GRMZM2G008456;GRMZM2G127034
TFmatrixID_0134	AT-Hook	999	+	0.97	gaaaaAAAAA	GRMZM2G150950
TFmatrixID_0137	AT-Hook	449	+	1	aaaAATAT	GRMZM2G150950
TFmatrixID_0143	AT-Hook	350	+	1	cgacAATAAt	GRMZM2G008456
TFmatrixID_0143	AT-Hook	825	-	1	tTTATTcata	GRMZM2G008456
TFmatrixID_0143	AT-Hook	1038	+	1	acgtAATAAa	GRMZM2G008456
TFmatrixID_0145	AT-Hook	447	+	1	agaAAAAT	GRMZM2G008456
TFmatrixID_0148	AT-Hook	489	+	1	aaAAAATt	GRMZM2G089562;GRMZM2G106133;GRMZM2G123887;GRMZM2G159926;GRMZM2G164489
TFmatrixID_0148	AT-Hook	593	-	0.99	gATTTTtt	GRMZM2G089562;GRMZM2G106133;GRMZM2G123887;GRMZM2G159926;GRMZM2G164489
TFmatrixID_0150	AT-Hook	450	+	1	aaAATATtca	GRMZM2G008456;GRMZM2G127034
TFmatrixID_0150	AT-Hook	450	-	1	aaaATATTca	GRMZM2G008456;GRMZM2G127034
TFmatrixID_0150	AT-Hook	800	+	0.99	gaAATATtgc	GRMZM2G008456;GRMZM2G127034
TFmatrixID_0150	AT-Hook	800	-	0.99	gaaATATTgc	GRMZM2G008456;GRMZM2G127034
TFmatrixID_0152	AT-Hook	490	+	1	aaAAATT	GRMZM2G089562;GRMZM2G106133;GRMZM2G123887;GRMZM2G164489
TFmatrixID_0154	AT-Hook	450	+	0.93	aAAATAtt	GRMZM2G150950
TFmatrixID_0156	ARF;B3	348	+	1	gcCGACAat	GRMZM2G028980;GRMZM2G034840;GRMZM2G035405;GRMZM2G073750;GRMZM2G078274;GRMZM2G081158;GRMZM2G086949;GRMZM2G102845;GRMZM2G160005;GRMZM2G169820;GRMZM2G317900;GRMZM2G378580;GRMZM2G475882
TFmatrixID_0172	bHLH	1035	+	0.89	ttCACGTaat	GRMZM2G009478;GRMZM2G089501;GRMZM2G317450
TFmatrixID_0174	bHLH	167	+	0.75	GCAAGcgc	AC197246.3_FG002;AC212449.4_FG005;AC233869.1_FG003;GRMZM2G008898;GRMZM2G024530;GRMZM2G027563;GRMZM2G030762;GRMZM2G046493;GRMZM2G067654;GRMZM2G074438;GRMZM2G080168;GRMZM2G083504;GRMZM2G092091;GRMZM2G101350;GRMZM2G116785;GRMZM2G137358;GRMZM2G137541;GRMZM2G144275;GRMZM2G145579;GRMZM2G171818;GRMZM2G176289;GRMZM2G178182;GRMZM2G180406;GRMZM2G180452;GRMZM2G336408;GRMZM2G350165;GRMZM2G378653;GRMZM2G38554…
TFmatrixID_0174	bHLH	173	+	0.75	GCACCtga	AC197246.3_FG002;AC212449.4_FG005;AC233869.1_FG003;GRMZM2G008898;GRMZM2G024530;GRMZM2G027563;GRMZM2G030762;GRMZM2G046493;GRMZM2G067654;GRMZM2G074438;GRMZM2G080168;GRMZM2G083504;GRMZM2G092091;GRMZM2G101350;GRMZM2G116785;GRMZM2G137358;GRMZM2G137541;GRMZM2G144275;GRMZM2G145579;GRMZM2G171818;GRMZM2G176289;GRMZM2G178182;GRMZM2G180406;GRMZM2G180452;GRMZM2G336408;GRMZM2G350165;GRMZM2G378653;GRMZM2G38554…
TFmatrixID_0174	bHLH	272	+	0.75	CCACGcgc	AC197246.3_FG002;AC212449.4_FG005;AC233869.1_FG003;GRMZM2G008898;GRMZM2G024530;GRMZM2G027563;GRMZM2G030762;GRMZM2G046493;GRMZM2G067654;GRMZM2G074438;GRMZM2G080168;GRMZM2G083504;GRMZM2G092091;GRMZM2G101350;GRMZM2G116785;GRMZM2G137358;GRMZM2G137541;GRMZM2G144275;GRMZM2G145579;GRMZM2G171818;GRMZM2G176289;GRMZM2G178182;GRMZM2G180406;GRMZM2G180452;GRMZM2G336408;GRMZM2G350165;GRMZM2G378653;GRMZM2G38554…
TFmatrixID_0174	bHLH	272	-	0.75	ccaCGCGC	AC197246.3_FG002;AC212449.4_FG005;AC233869.1_FG003;GRMZM2G008898;GRMZM2G024530;GRMZM2G027563;GRMZM2G030762;GRMZM2G046493;GRMZM2G067654;GRMZM2G074438;GRMZM2G080168;GRMZM2G083504;GRMZM2G092091;GRMZM2G101350;GRMZM2G116785;GRMZM2G137358;GRMZM2G137541;GRMZM2G144275;GRMZM2G145579;GRMZM2G171818;GRMZM2G176289;GRMZM2G178182;GRMZM2G180406;GRMZM2G180452;GRMZM2G336408;GRMZM2G350165;GRMZM2G378653;GRMZM2G38554…
TFmatrixID_0174	bHLH	931	-	0.75	ccaCTTGC	AC197246.3_FG002;AC212449.4_FG005;AC233869.1_FG003;GRMZM2G008898;GRMZM2G024530;GRMZM2G027563;GRMZM2G030762;GRMZM2G046493;GRMZM2G067654;GRMZM2G074438;GRMZM2G080168;GRMZM2G083504;GRMZM2G092091;GRMZM2G101350;GRMZM2G116785;GRMZM2G137358;GRMZM2G137541;GRMZM2G144275;GRMZM2G145579;GRMZM2G171818;GRMZM2G176289;GRMZM2G178182;GRMZM2G180406;GRMZM2G180452;GRMZM2G336408;GRMZM2G350165;GRMZM2G378653;GRMZM2G38554…
TFmatrixID_0174	bHLH	1095	+	0.88	GCACAtgc	AC197246.3_FG002;AC212449.4_FG005;AC233869.1_FG003;GRMZM2G008898;GRMZM2G024530;GRMZM2G027563;GRMZM2G030762;GRMZM2G046493;GRMZM2G067654;GRMZM2G074438;GRMZM2G080168;GRMZM2G083504;GRMZM2G092091;GRMZM2G101350;GRMZM2G116785;GRMZM2G137358;GRMZM2G137541;GRMZM2G144275;GRMZM2G145579;GRMZM2G171818;GRMZM2G176289;GRMZM2G178182;GRMZM2G180406;GRMZM2G180452;GRMZM2G336408;GRMZM2G350165;GRMZM2G378653;GRMZM2G38554…
TFmatrixID_0174	bHLH	1095	-	0.88	gcaCATGC	AC197246.3_FG002;AC212449.4_FG005;AC233869.1_FG003;GRMZM2G008898;GRMZM2G024530;GRMZM2G027563;GRMZM2G030762;GRMZM2G046493;GRMZM2G067654;GRMZM2G074438;GRMZM2G080168;GRMZM2G083504;GRMZM2G092091;GRMZM2G101350;GRMZM2G116785;GRMZM2G137358;GRMZM2G137541;GRMZM2G144275;GRMZM2G145579;GRMZM2G171818;GRMZM2G176289;GRMZM2G178182;GRMZM2G180406;GRMZM2G180452;GRMZM2G336408;GRMZM2G350165;GRMZM2G378653;GRMZM2G38554…
TFmatrixID_0174	bHLH	1142	+	0.75	ACACGtcc	AC197246.3_FG002;AC212449.4_FG005;AC233869.1_FG003;GRMZM2G008898;GRMZM2G024530;GRMZM2G027563;GRMZM2G030762;GRMZM2G046493;GRMZM2G067654;GRMZM2G074438;GRMZM2G080168;GRMZM2G083504;GRMZM2G092091;GRMZM2G101350;GRMZM2G116785;GRMZM2G137358;GRMZM2G137541;GRMZM2G144275;GRMZM2G145579;GRMZM2G171818;GRMZM2G176289;GRMZM2G178182;GRMZM2G180406;GRMZM2G180452;GRMZM2G336408;GRMZM2G350165;GRMZM2G378653;GRMZM2G38554…
TFmatrixID_0174	bHLH	1142	-	0.75	acaCGTCC	AC197246.3_FG002;AC212449.4_FG005;AC233869.1_FG003;GRMZM2G008898;GRMZM2G024530;GRMZM2G027563;GRMZM2G030762;GRMZM2G046493;GRMZM2G067654;GRMZM2G074438;GRMZM2G080168;GRMZM2G083504;GRMZM2G092091;GRMZM2G101350;GRMZM2G116785;GRMZM2G137358;GRMZM2G137541;GRMZM2G144275;GRMZM2G145579;GRMZM2G171818;GRMZM2G176289;GRMZM2G178182;GRMZM2G180406;GRMZM2G180452;GRMZM2G336408;GRMZM2G350165;GRMZM2G378653;GRMZM2G38554…
TFmatrixID_0176	bHLH	930	+	1	tccACTTGc	AC234203.1_FG014;GRMZM2G085467;GRMZM2G114873;GRMZM2G142932;GRMZM2G153454;GRMZM2G162382;GRMZM2G336408;GRMZM2G350165;GRMZM2G437481
TFmatrixID_0182	bZIP	1138	-	0.95	gcctaCACGTccg	GRMZM2G002075;GRMZM2G077124;GRMZM2G157722;GRMZM2G161009;GRMZM2G168079;GRMZM2G478417
TFmatrixID_0185	bZIP	792	-	0.97	agTGACGtga	GRMZM2G000842;GRMZM2G006578;GRMZM2G030877;GRMZM2G055993;GRMZM2G060216;GRMZM2G060290;GRMZM2G080731;GRMZM2G094352;GRMZM2G125243;GRMZM2G125934;GRMZM2G131961;GRMZM2G133331;GRMZM2G174284;GRMZM2G361847;GRMZM2G366264;GRMZM2G445575
TFmatrixID_0189	bZIP	792	-	0.99	agtgACGTGa	GRMZM2G045236;GRMZM2G060109
TFmatrixID_0189	bZIP	1036	+	0.97	tCACGTaata	GRMZM2G045236;GRMZM2G060109
TFmatrixID_0189	bZIP	1142	+	0.96	aCACGTccga	GRMZM2G045236;GRMZM2G060109
TFmatrixID_0191	bZIP	792	-	0.98	agtGACGTga	GRMZM2G000842;GRMZM2G006578;GRMZM2G030877;GRMZM2G055993;GRMZM2G060216;GRMZM2G060290;GRMZM2G080731;GRMZM2G094352;GRMZM2G125243;GRMZM2G125934;GRMZM2G131961;GRMZM2G133331;GRMZM2G174284;GRMZM2G361847;GRMZM2G366264;GRMZM2G380897;GRMZM2G445575
TFmatrixID_0193	bZIP	20	+	0.75	ACACCtgg	GRMZM2G002075;GRMZM2G157722;GRMZM2G161009;GRMZM2G168079;GRMZM2G478417
TFmatrixID_0193	bZIP	137	+	0.75	ACCCGcgt	GRMZM2G002075;GRMZM2G157722;GRMZM2G161009;GRMZM2G168079;GRMZM2G478417
TFmatrixID_0193	bZIP	137	-	0.75	accCGCGT	GRMZM2G002075;GRMZM2G157722;GRMZM2G161009;GRMZM2G168079;GRMZM2G478417
TFmatrixID_0193	bZIP	147	-	0.75	acgCTTGT	GRMZM2G002075;GRMZM2G157722;GRMZM2G161009;GRMZM2G168079;GRMZM2G478417
TFmatrixID_0193	bZIP	676	+	0.75	ACTCGttt	GRMZM2G002075;GRMZM2G157722;GRMZM2G161009;GRMZM2G168079;GRMZM2G478417
TFmatrixID_0193	bZIP	676	-	0.75	actCGTTT	GRMZM2G002075;GRMZM2G157722;GRMZM2G161009;GRMZM2G168079;GRMZM2G478417
TFmatrixID_0193	bZIP	866	-	0.75	aaaAGTGT	GRMZM2G002075;GRMZM2G157722;GRMZM2G161009;GRMZM2G168079;GRMZM2G478417
TFmatrixID_0193	bZIP	968	-	0.75	ccaGGTGT	GRMZM2G002075;GRMZM2G157722;GRMZM2G161009;GRMZM2G168079;GRMZM2G478417
TFmatrixID_0193	bZIP	1075	-	0.75	cccCGTGT	GRMZM2G002075;GRMZM2G157722;GRMZM2G161009;GRMZM2G168079;GRMZM2G478417
TFmatrixID_0193	bZIP	1142	+	0.75	ACACGtcc	GRMZM2G002075;GRMZM2G157722;GRMZM2G161009;GRMZM2G168079;GRMZM2G478417
TFmatrixID_0194	bZIP	1140	+	0.94	ctaCACGTcc	GRMZM2G011932;GRMZM2G019106;GRMZM2G074373;GRMZM2G117851;GRMZM2G153144;GRMZM2G164622;GRMZM2G171370
TFmatrixID_0195	bZIP	792	-	1	agTGACGtga	GRMZM2G000842;GRMZM2G006578;GRMZM2G030877;GRMZM2G055993;GRMZM2G060216;GRMZM2G060290;GRMZM2G080731;GRMZM2G094352;GRMZM2G125243;GRMZM2G125934;GRMZM2G131961;GRMZM2G133331;GRMZM2G174284;GRMZM2G361847;GRMZM2G366264;GRMZM2G380897;GRMZM2G445575
TFmatrixID_0196	bZIP	793	-	0.99	gTGACGtg	GRMZM2G000842;GRMZM2G006578;GRMZM2G030877;GRMZM2G055993;GRMZM2G060216;GRMZM2G060290;GRMZM2G080731;GRMZM2G094352;GRMZM2G125243;GRMZM2G125934;GRMZM2G131961;GRMZM2G133331;GRMZM2G174284;GRMZM2G361847;GRMZM2G366264;GRMZM2G380897;GRMZM2G445575
TFmatrixID_0197	bZIP	792	-	0.95	agTGACGtga	GRMZM2G000842;GRMZM2G006578;GRMZM2G030877;GRMZM2G055993;GRMZM2G060216;GRMZM2G060290;GRMZM2G080731;GRMZM2G094352;GRMZM2G125243;GRMZM2G125934;GRMZM2G131961;GRMZM2G133331;GRMZM2G174284;GRMZM2G361847;GRMZM2G366264;GRMZM2G445575
TFmatrixID_0197	bZIP	1238	+	0.91	ggcCGTCAac	GRMZM2G000842;GRMZM2G006578;GRMZM2G030877;GRMZM2G055993;GRMZM2G060216;GRMZM2G060290;GRMZM2G080731;GRMZM2G094352;GRMZM2G125243;GRMZM2G125934;GRMZM2G131961;GRMZM2G133331;GRMZM2G174284;GRMZM2G361847;GRMZM2G366264;GRMZM2G445575
TFmatrixID_0198	bZIP	791	-	0.97	tagtGACGTgaa	GRMZM2G007063;GRMZM2G016150;GRMZM2G019446;GRMZM2G073427;GRMZM2G098904;GRMZM2G103647
TFmatrixID_0198	bZIP	1141	+	0.94	tacACGTCcgag	GRMZM2G007063;GRMZM2G016150;GRMZM2G019446;GRMZM2G073427;GRMZM2G098904;GRMZM2G103647
TFmatrixID_0199	bZIP	792	-	1	agTGACGtga	GRMZM2G000842;GRMZM2G006578;GRMZM2G030877;GRMZM2G055993;GRMZM2G060216;GRMZM2G060290;GRMZM2G080731;GRMZM2G094352;GRMZM2G125243;GRMZM2G125934;GRMZM2G131961;GRMZM2G133331;GRMZM2G174284;GRMZM2G361847;GRMZM2G366264;GRMZM2G380897;GRMZM2G445575
TFmatrixID_0213	C2H2	307	+	1	cACACTc	AC185108.3_FG011
TFmatrixID_0213	C2H2	868	-	1	aAGTGTt	AC185108.3_FG011
TFmatrixID_0214	C2H2	304	+	0.99	cagcACACTcact	GRMZM2G001205;GRMZM2G061897;GRMZM2G112799;GRMZM2G338056;GRMZM2G376061
TFmatrixID_0215	C2H2	307	+	1	cACACTc	GRMZM2G001205;GRMZM2G061897;GRMZM2G307402
TFmatrixID_0219	C2H2	307	+	1	cACACTc	GRMZM2G089557
TFmatrixID_0220	CAMTA	139	+	1	cCGCGTgga	GRMZM2G341747
TFmatrixID_0220	CAMTA	271	-	0.98	cccACGCGc	GRMZM2G341747
TFmatrixID_0220	CAMTA	699	+	1	cCGCGTgaa	GRMZM2G341747
TFmatrixID_0220	CAMTA	1128	+	1	cCGCGTctc	GRMZM2G341747
TFmatrixID_0221	CAMTA	136	+	1	caccCGCGT	GRMZM2G341747
TFmatrixID_0221	CAMTA	274	-	0.99	ACGCGctcg	GRMZM2G341747
TFmatrixID_0221	CAMTA	696	+	1	aaacCGCGT	GRMZM2G341747
TFmatrixID_0221	CAMTA	1125	+	1	tcccCGCGT	GRMZM2G341747
TFmatrixID_0228	CPP	616	+	1	caTTTAAatg	GRMZM2G153754
TFmatrixID_0228	CPP	616	-	1	catTTAAAtg	GRMZM2G153754
TFmatrixID_0252	E2F/DP	182	-	0.99	ctggGCGCGg	AC233850.1_FG005
TFmatrixID_0252	E2F/DP	1100	-	0.99	tgcgGCGCGa	AC233850.1_FG005
TFmatrixID_0281	HD-ZIP	352	-	1	acAATAAtg	GRMZM2G003304;GRMZM2G021339;GRMZM2G041127;GRMZM2G056600;GRMZM2G097349;GRMZM2G122076;GRMZM2G139963;GRMZM2G178741
TFmatrixID_0300	TALE;Homeodomain	1238	-	0.99	ggcCGTCAac	GRMZM2G017087;GRMZM2G028041;GRMZM2G032332;GRMZM2G061101;GRMZM2G087741;GRMZM2G094241;GRMZM2G452178
TFmatrixID_0310	Trihelix	375	-	0.99	ggGTAAAtgt	GRMZM2G111760
TFmatrixID_0310	Trihelix	742	+	0.98	taaTTTACta	GRMZM2G111760
TFmatrixID_0311	Trihelix	375	-	0.99	ggGTAAAtgt	GRMZM2G111760
TFmatrixID_0311	Trihelix	742	+	0.99	taaTTTACta	GRMZM2G111760
TFmatrixID_0312	Trihelix	946	+	0.99	tccaGGTTAa	GRMZM2G047370
TFmatrixID_0317	Trihelix	946	+	0.99	tccaGGTTAa	GRMZM2G047370
TFmatrixID_0320	Myb/SANT;MYB-related	773	+	0.86	gcGATATtt	AC209374.4_FG003;GRMZM2G057408;GRMZM2G135052;GRMZM2G170148
TFmatrixID_0323	MYB-related	773	-	0.99	gcGATATtta	GRMZM2G145041
TFmatrixID_0334	MYB-related	774	-	0.98	cGATATtta	GRMZM2G145041
TFmatrixID_0334	MYB-related	816	-	0.96	cGATATtgt	GRMZM2G145041
TFmatrixID_0348	ARR-B	473	+	0.97	gaggATCTTc	GRMZM2G099797;GRMZM2G126834
TFmatrixID_0357	G2-like	450	+	0.97	aaAATATtca	GRMZM2G034563;GRMZM2G056400;GRMZM2G060834;GRMZM2G070865;GRMZM2G082264;GRMZM2G123308;GRMZM2G175827;GRMZM2G315506;GRMZM2G370425
TFmatrixID_0357	G2-like	450	-	0.97	aaaATATTca	GRMZM2G034563;GRMZM2G056400;GRMZM2G060834;GRMZM2G070865;GRMZM2G082264;GRMZM2G123308;GRMZM2G175827;GRMZM2G315506;GRMZM2G370425
TFmatrixID_0365	MYB-related	544	+	1	cgtTAGGGta	GRMZM2G023667;GRMZM2G108424
TFmatrixID_0381	NAC	1037	-	0.97	cACGTAat	GRMZM2G011598;GRMZM2G014653;GRMZM2G018553;GRMZM2G042494;GRMZM2G068973;GRMZM2G079632;GRMZM2G109627;GRMZM2G123667;GRMZM2G127379;GRMZM2G162739;GRMZM2G179885;GRMZM2G180328;GRMZM2G312201;GRMZM2G336533;GRMZM2G347043;GRMZM2G430849
TFmatrixID_0383	NAC	1035	+	0.96	ttcACGTAat	AC212859.3_FG008;GRMZM2G025642;GRMZM2G041668;GRMZM2G041746;GRMZM2G069047;GRMZM2G091490;GRMZM2G092465;GRMZM2G099144;GRMZM2G104074;GRMZM2G171395;GRMZM2G178998;GRMZM2G315140;GRMZM2G354151;GRMZM2G435824;GRMZM2G440219
TFmatrixID_0388	NAC	457	-	0.98	tCACGCcag	GRMZM2G008374;GRMZM2G009892;GRMZM2G018436;GRMZM2G031001;GRMZM2G062650;GRMZM2G139700;GRMZM2G154182;GRMZM2G159500;GRMZM2G181605;GRMZM2G393433;GRMZM2G430522
TFmatrixID_0391	NAC	457	-	0.98	tCACGCcagc	GRMZM2G008374;GRMZM2G009892;GRMZM2G018436;GRMZM2G031001;GRMZM2G062650;GRMZM2G139700;GRMZM2G154182;GRMZM2G159500;GRMZM2G181605;GRMZM2G393433;GRMZM2G430522
TFmatrixID_0391	NAC	963	-	0.98	cCACGCcagg	GRMZM2G008374;GRMZM2G009892;GRMZM2G018436;GRMZM2G031001;GRMZM2G062650;GRMZM2G139700;GRMZM2G154182;GRMZM2G159500;GRMZM2G181605;GRMZM2G393433;GRMZM2G430522
TFmatrixID_0393	NAC	457	-	0.98	tCACGCcagc	GRMZM2G008374;GRMZM2G009892;GRMZM2G031001;GRMZM2G062650;GRMZM2G139700;GRMZM2G154182;GRMZM2G159500;GRMZM2G181605;GRMZM2G393433;GRMZM2G430522
TFmatrixID_0395	NAC	455	-	0.99	attCACGCca	GRMZM2G008374;GRMZM2G009892;GRMZM2G018436;GRMZM2G031001;GRMZM2G062650;GRMZM2G139700;GRMZM2G154182;GRMZM2G159500;GRMZM2G181605;GRMZM2G393433;GRMZM2G430522
TFmatrixID_0417	GeBP	279	+	0.99	ctCGACCca	GRMZM2G026417;GRMZM2G030458;GRMZM2G075122;GRMZM2G082318
TFmatrixID_0422	TCP	958	+	0.97	ccGGACCacg	AC205574.3_FG006;GRMZM2G015037
TFmatrixID_0423	TCP	959	+	0.94	cGGACCac	AC205574.3_FG006;GRMZM2G015037
TFmatrixID_0427	TCP	327	+	0.87	gGGACCcc	GRMZM2G120151;GRMZM2G166946
TFmatrixID_0427	TCP	959	+	0.87	cGGACCac	GRMZM2G120151;GRMZM2G166946
TFmatrixID_0432	TCP	327	+	0.87	gGGACCcc	GRMZM2G120151;GRMZM2G166946
TFmatrixID_0432	TCP	959	+	0.88	cGGACCac	GRMZM2G120151;GRMZM2G166946
TFmatrixID_0436	TCP	325	+	0.87	tagGGACCcc	AC205574.3_FG006;GRMZM2G015037
TFmatrixID_0436	TCP	957	+	0.87	accGGACCac	AC205574.3_FG006;GRMZM2G015037
TFmatrixID_0440	TCP	54	+	0.92	aGGACCag	AC190734.2_FG003;GRMZM2G020805;GRMZM2G035944;GRMZM2G089361;GRMZM2G115516;GRMZM2G120151;GRMZM2G166946
TFmatrixID_0440	TCP	959	+	0.94	cGGACCac	AC190734.2_FG003;GRMZM2G020805;GRMZM2G035944;GRMZM2G089361;GRMZM2G115516;GRMZM2G120151;GRMZM2G166946
TFmatrixID_0442	WRKY	670	+	0.98	atGTCAActc	AC165171.2_FG002;AC198725.4_FG009;AC205562.3_FG002;AC209050.3_FG003;AC233880.1_FG010;GRMZM2G003551;GRMZM2G005207;GRMZM2G006497;GRMZM2G012724;GRMZM2G013391;GRMZM2G015433;GRMZM2G018487;GRMZM2G018721;GRMZM2G024505;GRMZM2G024898;GRMZM2G025895;GRMZM2G038158;GRMZM2G040298;GRMZM2G048450;GRMZM2G052671;GRMZM2G054125;GRMZM2G057011;GRMZM2G057116;GRMZM2G061408;GRMZM2G065290;GRMZM2G070211;GRMZM2G071907;GRMZM2…
TFmatrixID_0442	WRKY	1240	+	0.98	ccGTCAAcac	AC165171.2_FG002;AC198725.4_FG009;AC205562.3_FG002;AC209050.3_FG003;AC233880.1_FG010;GRMZM2G003551;GRMZM2G005207;GRMZM2G006497;GRMZM2G012724;GRMZM2G013391;GRMZM2G015433;GRMZM2G018487;GRMZM2G018721;GRMZM2G024505;GRMZM2G024898;GRMZM2G025895;GRMZM2G038158;GRMZM2G040298;GRMZM2G048450;GRMZM2G052671;GRMZM2G054125;GRMZM2G057011;GRMZM2G057116;GRMZM2G061408;GRMZM2G065290;GRMZM2G070211;GRMZM2G071907;GRMZM2…
TFmatrixID_0447	WRKY	669	+	0.99	catGTCAAct	AC165171.2_FG002;AC198725.4_FG009;AC205562.3_FG002;AC209050.3_FG003;AC233880.1_FG010;GRMZM2G003551;GRMZM2G005207;GRMZM2G006497;GRMZM2G012724;GRMZM2G013391;GRMZM2G015433;GRMZM2G018487;GRMZM2G018721;GRMZM2G023563;GRMZM2G024505;GRMZM2G024898;GRMZM2G025895;GRMZM2G029282;GRMZM2G038158;GRMZM2G040298;GRMZM2G048450;GRMZM2G052671;GRMZM2G054125;GRMZM2G057011;GRMZM2G057116;GRMZM2G061408;GRMZM2G063880;GRMZM2…
TFmatrixID_0450	WRKY	669	+	0.98	catGTCAAct	AC165171.2_FG002;AC198725.4_FG009;AC205562.3_FG002;AC209050.3_FG003;AC233880.1_FG010;GRMZM2G003551;GRMZM2G005207;GRMZM2G006497;GRMZM2G012724;GRMZM2G013391;GRMZM2G015433;GRMZM2G018487;GRMZM2G018721;GRMZM2G024505;GRMZM2G024898;GRMZM2G025895;GRMZM2G034421;GRMZM2G038158;GRMZM2G040298;GRMZM2G048450;GRMZM2G052671;GRMZM2G054125;GRMZM2G057011;GRMZM2G057116;GRMZM2G061408;GRMZM2G063880;GRMZM2G070211;GRMZM2…
TFmatrixID_0450	WRKY	1239	+	0.98	gccGTCAAca	AC165171.2_FG002;AC198725.4_FG009;AC205562.3_FG002;AC209050.3_FG003;AC233880.1_FG010;GRMZM2G003551;GRMZM2G005207;GRMZM2G006497;GRMZM2G012724;GRMZM2G013391;GRMZM2G015433;GRMZM2G018487;GRMZM2G018721;GRMZM2G024505;GRMZM2G024898;GRMZM2G025895;GRMZM2G034421;GRMZM2G038158;GRMZM2G040298;GRMZM2G048450;GRMZM2G052671;GRMZM2G054125;GRMZM2G057011;GRMZM2G057116;GRMZM2G061408;GRMZM2G063880;GRMZM2G070211;GRMZM2…
TFmatrixID_0453	WRKY	1241	+	0.9	cGTCAAca	AC165171.2_FG002;AC198725.4_FG009;AC209050.3_FG003;AC233880.1_FG010;GRMZM2G003551;GRMZM2G004060;GRMZM2G005207;GRMZM2G006497;GRMZM2G012724;GRMZM2G013391;GRMZM2G015433;GRMZM2G018487;GRMZM2G018721;GRMZM2G024505;GRMZM2G024898;GRMZM2G038158;GRMZM2G040298;GRMZM2G048450;GRMZM2G052671;GRMZM2G054125;GRMZM2G057011;GRMZM2G057116;GRMZM2G063216;GRMZM2G069668;GRMZM2G070211;GRMZM2G071907;GRMZM2G073272;GRMZM2G08…
TFmatrixID_0455	WRKY	669	+	0.95	catGTCAActc	AC165171.2_FG002;AC193630.3_FG003;AC198725.4_FG009;AC205562.3_FG002;AC209050.3_FG003;AC233880.1_FG010;GRMZM2G003551;GRMZM2G006497;GRMZM2G012724;GRMZM2G013391;GRMZM2G015433;GRMZM2G018487;GRMZM2G018721;GRMZM2G024505;GRMZM2G024898;GRMZM2G025895;GRMZM2G030272;GRMZM2G038158;GRMZM2G040298;GRMZM2G048450;GRMZM2G052671;GRMZM2G054125;GRMZM2G057011;GRMZM2G057116;GRMZM2G061408;GRMZM2G063880;GRMZM2G070211;GRM…
TFmatrixID_0455	WRKY	1239	+	0.94	gccGTCAAcac	AC165171.2_FG002;AC193630.3_FG003;AC198725.4_FG009;AC205562.3_FG002;AC209050.3_FG003;AC233880.1_FG010;GRMZM2G003551;GRMZM2G006497;GRMZM2G012724;GRMZM2G013391;GRMZM2G015433;GRMZM2G018487;GRMZM2G018721;GRMZM2G024505;GRMZM2G024898;GRMZM2G025895;GRMZM2G030272;GRMZM2G038158;GRMZM2G040298;GRMZM2G048450;GRMZM2G052671;GRMZM2G054125;GRMZM2G057011;GRMZM2G057116;GRMZM2G061408;GRMZM2G063880;GRMZM2G070211;GRM…
TFmatrixID_0457	WRKY	670	+	0.99	atGTCAActc	AC165171.2_FG002;AC198725.4_FG009;AC205562.3_FG002;AC209050.3_FG003;AC233880.1_FG010;GRMZM2G003551;GRMZM2G005207;GRMZM2G006497;GRMZM2G012724;GRMZM2G013391;GRMZM2G015433;GRMZM2G018487;GRMZM2G018721;GRMZM2G023563;GRMZM2G024505;GRMZM2G024898;GRMZM2G025895;GRMZM2G029282;GRMZM2G034421;GRMZM2G038158;GRMZM2G040298;GRMZM2G048450;GRMZM2G052671;GRMZM2G054125;GRMZM2G057011;GRMZM2G057116;GRMZM2G061408;GRMZM2…
TFmatrixID_0457	WRKY	1240	+	0.98	ccGTCAAcac	AC165171.2_FG002;AC198725.4_FG009;AC205562.3_FG002;AC209050.3_FG003;AC233880.1_FG010;GRMZM2G003551;GRMZM2G005207;GRMZM2G006497;GRMZM2G012724;GRMZM2G013391;GRMZM2G015433;GRMZM2G018487;GRMZM2G018721;GRMZM2G023563;GRMZM2G024505;GRMZM2G024898;GRMZM2G025895;GRMZM2G029282;GRMZM2G034421;GRMZM2G038158;GRMZM2G040298;GRMZM2G048450;GRMZM2G052671;GRMZM2G054125;GRMZM2G057011;GRMZM2G057116;GRMZM2G061408;GRMZM2…
TFmatrixID_0461	WRKY	671	+	0.98	tGTCAActcg	AC165171.2_FG002;AC205562.3_FG002;AC233880.1_FG010;GRMZM2G003551;GRMZM2G004060;GRMZM2G005207;GRMZM2G006497;GRMZM2G012724;GRMZM2G013391;GRMZM2G015433;GRMZM2G018487;GRMZM2G024505;GRMZM2G024898;GRMZM2G025895;GRMZM2G029282;GRMZM2G030272;GRMZM2G038158;GRMZM2G040298;GRMZM2G048450;GRMZM2G052671;GRMZM2G054125;GRMZM2G057011;GRMZM2G057116;GRMZM2G059562;GRMZM2G060918;GRMZM2G061408;GRMZM2G063216;GRMZM2G06388…
TFmatrixID_0461	WRKY	1241	+	0.98	cGTCAAcacc	AC165171.2_FG002;AC205562.3_FG002;AC233880.1_FG010;GRMZM2G003551;GRMZM2G004060;GRMZM2G005207;GRMZM2G006497;GRMZM2G012724;GRMZM2G013391;GRMZM2G015433;GRMZM2G018487;GRMZM2G024505;GRMZM2G024898;GRMZM2G025895;GRMZM2G029282;GRMZM2G030272;GRMZM2G038158;GRMZM2G040298;GRMZM2G048450;GRMZM2G052671;GRMZM2G054125;GRMZM2G057011;GRMZM2G057116;GRMZM2G059562;GRMZM2G060918;GRMZM2G061408;GRMZM2G063216;GRMZM2G06388…
TFmatrixID_0472	Dof	1189	+	1	AAAGCa	GRMZM2G009406
TFmatrixID_0473	Dof	1165	-	1	cGCTTT	GRMZM2G179069
TFmatrixID_0478	Dof	1166	-	1	GCTTT	MNB1A_MAIZE
TFmatrixID_0478	Dof	1189	+	1	AAAGC	MNB1A_MAIZE
TFmatrixID_0480	Dof	1166	-	1	GCTTT	GRMZM2G146283
TFmatrixID_0480	Dof	1189	+	1	AAAGC	GRMZM2G146283
TFmatrixID_0490	bZIP	794	-	0.99	tGACGTg	GRMZM2G000842;GRMZM2G006578;GRMZM2G030877;GRMZM2G055993;GRMZM2G060216;GRMZM2G060290;GRMZM2G080731;GRMZM2G094352;GRMZM2G125243;GRMZM2G125934;GRMZM2G131961;GRMZM2G133331;GRMZM2G174284;GRMZM2G361847;GRMZM2G366264;GRMZM2G445575
TFmatrixID_0497	bHLH	788	+	0.87	aaatagtgACGTGa	GRMZM2G017349;GRMZM2G027563;GRMZM2G030744;GRMZM2G042920;GRMZM2G062458;GRMZM2G062541;GRMZM2G065374;GRMZM2G067654;GRMZM2G080054;GRMZM2G087622;GRMZM2G115960;GRMZM2G165042;GRMZM2G180452;GRMZM2G336408;GRMZM2G350165
TFmatrixID_0512	ERF	1151	+	0.99	aGCCGCca	AC198979.4_FG009;AC233933.1_FG001;GRMZM2G021790;GRMZM2G024871;GRMZM2G055180;GRMZM2G060206;GRMZM2G060517;GRMZM2G073258;GRMZM2G080516;GRMZM2G123119;GRMZM2G317596;GRMZM2G379652;GRMZM2G381441;GRMZM2G466044;GRMZM2G474326;GRMZM2G478965
TFmatrixID_0528	ERF;RAV	19	+	0.99	tacACCTGgatc	GRMZM2G059939;GRMZM2G159592;GRMZM2G169654
TFmatrixID_0528	ERF;RAV	172	+	0.99	cgcACCTGacct	GRMZM2G059939;GRMZM2G159592;GRMZM2G169654
TFmatrixID_0528	ERF;RAV	965	-	0.99	acgcCAGGTgtt	GRMZM2G059939;GRMZM2G159592;GRMZM2G169654
TFmatrixID_0533	bZIP	791	-	0.98	tagTGACGtga	GRMZM2G000842;GRMZM2G006578;GRMZM2G030877;GRMZM2G055993;GRMZM2G060216;GRMZM2G060290;GRMZM2G080731;GRMZM2G094352;GRMZM2G125243;GRMZM2G125934;GRMZM2G131961;GRMZM2G133331;GRMZM2G174284;GRMZM2G361847;GRMZM2G366264;GRMZM2G380897;GRMZM2G445575
TFmatrixID_0548	Dof	1164	-	0.99	gcgCTTTAagt	MNB1A_MAIZE
TFmatrixID_0549	Dof	1164	-	1	gcGCTTTaagt	GRMZM2G009406
TFmatrixID_0549	Dof	1185	+	0.99	acgaAAAGCag	GRMZM2G009406
TFmatrixID_0555	bZIP	425	+	0.74	tATCTAcggaaaacga	GRMZM2G007063;GRMZM2G015534;GRMZM2G016150;GRMZM2G019446;GRMZM2G073427
TFmatrixID_0557	Dof	44	+	0.99	tatAAAAGgga	GRMZM2G146283
TFmatrixID_0561	ERF;RAV	19	+	0.99	tacACCTGgatc	GRMZM2G059939;GRMZM2G159592;GRMZM2G169654
TFmatrixID_0561	ERF;RAV	172	+	0.99	cgcACCTGacct	GRMZM2G059939;GRMZM2G159592;GRMZM2G169654
TFmatrixID_0561	ERF;RAV	965	-	0.99	acgcCAGGTgtt	GRMZM2G059939;GRMZM2G159592;GRMZM2G169654
TFmatrixID_0569	TBP	43	+	1	ctATAAAagggagga	GRMZM2G149238;GRMZM2G161418
TFmatrixID_0569	TBP	829	-	0.98	ttcatagtTTTATag	GRMZM2G149238;GRMZM2G161418
TFmatrixID_0570	TBP	42	+	1	actaTAAAAg	GRMZM2G149238;GRMZM2G161418
TFmatrixID_0570	TBP	835	-	0.99	gTTTTAtagc	GRMZM2G149238;GRMZM2G161418
TFmatrixID_0580	AT-Hook	450	+	1	aAAATAt	GRMZM2G008456;GRMZM2G127034
TFmatrixID_0581	AT-Hook	733	-	0.85	ATATTcacataattt	GRMZM2G008456;GRMZM2G127034
TFmatrixID_0585	TBP	42	+	0.97	actATAAAagg	GRMZM2G149238;GRMZM2G161418
TFmatrixID_0585	TBP	834	-	0.97	agtTTTATagc	GRMZM2G149238;GRMZM2G161418

## Sheet: Table S9
Supplementary Table 9. Promoter region binding element prediction of Ye3189
Matrix ID	Family	Position	Strand	Similar Score	Hit Sequence	TF ID or Motif name
TFmatrixID_0059	ERF;AP2	346	+	0.99	aCGCCGacaa	AC198979.4_FG009;GRMZM2G002119;GRMZM2G020016;GRMZM2G020054;GRMZM2G020150;GRMZM2G023708;GRMZM2G047999;GRMZM2G066158;GRMZM2G068967;GRMZM2G076896;GRMZM2G079653;GRMZM2G079825;GRMZM2G089995;GRMZM2G131281;GRMZM2G132185;GRMZM2G132223;GRMZM2G138396;GRMZM2G142179;GRMZM2G146028;GRMZM2G149756;GRMZM2G174347;GRMZM2G307665;GRMZM2G309731;GRMZM2G310368;GRMZM2G328197;GRMZM2G369472;GRMZM2G429378;GRMZM2G438202;GRMZ…
TFmatrixID_0070	ERF;AP2	317	-	0.99	cGTCGGctt	GRMZM2G000520;GRMZM2G041839;GRMZM2G047918;GRMZM2G048621;GRMZM2G056729;GRMZM2G072926;GRMZM2G172936;GRMZM2G368838;GRMZM2G477287
TFmatrixID_0070	ERF;AP2	346	+	1	acgCCGACa	GRMZM2G000520;GRMZM2G041839;GRMZM2G047918;GRMZM2G048621;GRMZM2G056729;GRMZM2G072926;GRMZM2G172936;GRMZM2G368838;GRMZM2G477287
TFmatrixID_0079	ERF	1150	+	0.99	gaGCCGCcag	AC198979.4_FG009;AC233933.1_FG001;GRMZM2G021790;GRMZM2G024871;GRMZM2G055180;GRMZM2G060206;GRMZM2G060517;GRMZM2G073258;GRMZM2G080516;GRMZM2G123119;GRMZM2G317596;GRMZM2G379652;GRMZM2G381441;GRMZM2G466044;GRMZM2G474326;GRMZM2G478965
TFmatrixID_0080	ERF;AP2	346	+	0.99	acgCCGACaa	AC187157.4_FG001;AC198403.3_FG001;AC233944.1_FG002;GRMZM2G005301;GRMZM2G028969;GRMZM2G041839;GRMZM2G047918;GRMZM2G048621;GRMZM2G056729;GRMZM2G072926;GRMZM2G073047;GRMZM2G172936
TFmatrixID_0082	ERF;AP2	346	+	1	aCGCCGaca	AC198979.4_FG009;GRMZM2G016434;GRMZM2G018984;GRMZM2G020150;GRMZM2G021790;GRMZM2G024871;GRMZM2G025062;GRMZM2G053503;GRMZM2G055180;GRMZM2G055204;GRMZM2G057386;GRMZM2G076896;GRMZM2G080516;GRMZM2G087059;GRMZM2G100727;GRMZM2G138396;GRMZM2G149756;GRMZM2G169382;GRMZM2G174347;GRMZM2G175525;GRMZM2G307665;GRMZM2G309731;GRMZM2G317596;GRMZM2G381441;GRMZM2G425798;GRMZM2G457562;GRMZM2G466044;GRMZM2G474326;GRMZ…
TFmatrixID_0085	ERF;AP2	315	-	0.98	ctcGTCGGct	AC198403.3_FG001;GRMZM2G028969;GRMZM2G041839;GRMZM2G042756;GRMZM2G047918;GRMZM2G048621;GRMZM2G056729;GRMZM2G072926;GRMZM2G073047;GRMZM2G137341;GRMZM2G172936;GRMZM2G368838;GRMZM2G380377;GRMZM2G424348
TFmatrixID_0085	ERF;AP2	347	+	0.99	cgCCGACaat	AC198403.3_FG001;GRMZM2G028969;GRMZM2G041839;GRMZM2G042756;GRMZM2G047918;GRMZM2G048621;GRMZM2G056729;GRMZM2G072926;GRMZM2G073047;GRMZM2G137341;GRMZM2G172936;GRMZM2G368838;GRMZM2G380377;GRMZM2G424348
TFmatrixID_0086	ERF;AP2	316	-	0.97	tcGTCGGctt	AC198403.3_FG001;GRMZM2G028969;GRMZM2G041839;GRMZM2G042756;GRMZM2G047918;GRMZM2G048621;GRMZM2G056729;GRMZM2G072926;GRMZM2G073047;GRMZM2G137341;GRMZM2G172936;GRMZM2G368838;GRMZM2G380377;GRMZM2G424348
TFmatrixID_0086	ERF;AP2	346	+	0.98	acgCCGACaa	AC198403.3_FG001;GRMZM2G028969;GRMZM2G041839;GRMZM2G042756;GRMZM2G047918;GRMZM2G048621;GRMZM2G056729;GRMZM2G072926;GRMZM2G073047;GRMZM2G137341;GRMZM2G172936;GRMZM2G368838;GRMZM2G380377;GRMZM2G424348
TFmatrixID_0088	ERF;AP2	347	+	0.95	cgCCGACa	AC187157.4_FG001;AC233944.1_FG002;GRMZM2G005301;GRMZM2G028969;GRMZM2G041839;GRMZM2G047918;GRMZM2G048621;GRMZM2G056729;GRMZM2G072926;GRMZM2G073047;GRMZM2G172936;GRMZM2G368838
TFmatrixID_0092	ERF	1150	+	1	gagCCGCCa	GRMZM2G057386;GRMZM2G466044;GRMZM2G474326
TFmatrixID_0093	Dof	1164	-	0.99	gcgCTTTAagt	P38564
TFmatrixID_0094	Dof	44	+	0.99	tatAAAAGgga	O24463
TFmatrixID_0102	ERF;AP2	1149	+	1	cgaGCCGCca	AC198979.4_FG009;GRMZM2G016434;GRMZM2G018984;GRMZM2G020150;GRMZM2G021790;GRMZM2G024871;GRMZM2G025062;GRMZM2G055180;GRMZM2G055204;GRMZM2G057386;GRMZM2G076896;GRMZM2G080516;GRMZM2G087059;GRMZM2G100727;GRMZM2G138396;GRMZM2G149756;GRMZM2G174347;GRMZM2G175525;GRMZM2G307665;GRMZM2G309731;GRMZM2G317596;GRMZM2G381441;GRMZM2G425798;GRMZM2G457562;GRMZM2G466044;GRMZM2G474326;GRMZM2G475678
TFmatrixID_0109	ERF	316	-	0.9	tcGTCGGctt	GRMZM2G042756;GRMZM2G137341;GRMZM2G380377
TFmatrixID_0109	ERF	346	+	0.99	acgCCGACaa	GRMZM2G042756;GRMZM2G137341;GRMZM2G380377
TFmatrixID_0118	ERF	347	+	0.92	cgCCGACa	GRMZM2G073047;GRMZM2G119865;GRMZM2G301860
TFmatrixID_0119	AP2;ERF	346	+	0.89	acgCCGACaa	AC233944.1_FG002;GRMZM2G005301;GRMZM2G028969;GRMZM2G047918;GRMZM2G056729;GRMZM2G072926;GRMZM2G073047;GRMZM2G119865;GRMZM2G301860
TFmatrixID_0121	ERF;AP2; ERF;bHLH	347	+	0.94	cgCCGACa	AC187157.4_FG001;AC233944.1_FG002;GRMZM2G005301;GRMZM2G028969;GRMZM2G041839;GRMZM2G047918;GRMZM2G048621;GRMZM2G056729;GRMZM2G072926;GRMZM2G073047;GRMZM2G119865;GRMZM2G172936;GRMZM2G301860;GRMZM2G368838;GRMZM2G421033;GRMZM2G174917
TFmatrixID_0129	AT-Hook	488	+	1	gaaaAAATT	GRMZM2G004878;GRMZM2G106133
TFmatrixID_0131	AT-Hook	825	-	1	TTTATtcat	GRMZM2G089562;GRMZM2G106133;GRMZM2G123887;GRMZM2G159926;GRMZM2G164489
TFmatrixID_0133	AT-Hook	485	+	1	ggggAAAAA	GRMZM2G008456;GRMZM2G127034
TFmatrixID_0133	AT-Hook	486	+	1	gggaAAAAA	GRMZM2G008456;GRMZM2G127034
TFmatrixID_0134	AT-Hook	999	+	0.97	gaaaaAAAAA	GRMZM2G150950
TFmatrixID_0137	AT-Hook	449	+	1	aaaAATAT	GRMZM2G150950
TFmatrixID_0143	AT-Hook	350	+	1	cgacAATAAt	GRMZM2G008456
TFmatrixID_0143	AT-Hook	825	-	1	tTTATTcata	GRMZM2G008456
TFmatrixID_0143	AT-Hook	1038	+	1	acgtAATAAa	GRMZM2G008456
TFmatrixID_0145	AT-Hook	447	+	1	agaAAAAT	GRMZM2G008456
TFmatrixID_0148	AT-Hook	489	+	1	aaAAAATt	GRMZM2G089562;GRMZM2G106133;GRMZM2G123887;GRMZM2G159926;GRMZM2G164489
TFmatrixID_0148	AT-Hook	593	-	0.99	gATTTTtt	GRMZM2G089562;GRMZM2G106133;GRMZM2G123887;GRMZM2G159926;GRMZM2G164489
TFmatrixID_0150	AT-Hook	450	+	1	aaAATATtca	GRMZM2G008456;GRMZM2G127034
TFmatrixID_0150	AT-Hook	450	-	1	aaaATATTca	GRMZM2G008456;GRMZM2G127034
TFmatrixID_0150	AT-Hook	800	+	0.99	gaAATATtgc	GRMZM2G008456;GRMZM2G127034
TFmatrixID_0150	AT-Hook	800	-	0.99	gaaATATTgc	GRMZM2G008456;GRMZM2G127034
TFmatrixID_0152	AT-Hook	490	+	1	aaAAATT	GRMZM2G089562;GRMZM2G106133;GRMZM2G123887;GRMZM2G164489
TFmatrixID_0154	AT-Hook	450	+	0.93	aAAATAtt	GRMZM2G150950
TFmatrixID_0156	ARF;B3	348	+	1	gcCGACAat	GRMZM2G028980;GRMZM2G034840;GRMZM2G035405;GRMZM2G073750;GRMZM2G078274;GRMZM2G081158;GRMZM2G086949;GRMZM2G102845;GRMZM2G160005;GRMZM2G169820;GRMZM2G317900;GRMZM2G378580;GRMZM2G475882
TFmatrixID_0172	bHLH	1035	+	0.89	ttCACGTaat	GRMZM2G009478;GRMZM2G089501;GRMZM2G317450
TFmatrixID_0174	bHLH	167	+	0.75	GCAAGcgc	AC197246.3_FG002;AC212449.4_FG005;AC233869.1_FG003;GRMZM2G008898;GRMZM2G024530;GRMZM2G027563;GRMZM2G030762;GRMZM2G046493;GRMZM2G067654;GRMZM2G074438;GRMZM2G080168;GRMZM2G083504;GRMZM2G092091;GRMZM2G101350;GRMZM2G116785;GRMZM2G137358;GRMZM2G137541;GRMZM2G144275;GRMZM2G145579;GRMZM2G171818;GRMZM2G176289;GRMZM2G178182;GRMZM2G180406;GRMZM2G180452;GRMZM2G336408;GRMZM2G350165;GRMZM2G378653;GRMZM2G38554…
TFmatrixID_0174	bHLH	173	+	0.75	GCACCtga	AC197246.3_FG002;AC212449.4_FG005;AC233869.1_FG003;GRMZM2G008898;GRMZM2G024530;GRMZM2G027563;GRMZM2G030762;GRMZM2G046493;GRMZM2G067654;GRMZM2G074438;GRMZM2G080168;GRMZM2G083504;GRMZM2G092091;GRMZM2G101350;GRMZM2G116785;GRMZM2G137358;GRMZM2G137541;GRMZM2G144275;GRMZM2G145579;GRMZM2G171818;GRMZM2G176289;GRMZM2G178182;GRMZM2G180406;GRMZM2G180452;GRMZM2G336408;GRMZM2G350165;GRMZM2G378653;GRMZM2G38554…
TFmatrixID_0174	bHLH	272	+	0.75	CCACGcgc	AC197246.3_FG002;AC212449.4_FG005;AC233869.1_FG003;GRMZM2G008898;GRMZM2G024530;GRMZM2G027563;GRMZM2G030762;GRMZM2G046493;GRMZM2G067654;GRMZM2G074438;GRMZM2G080168;GRMZM2G083504;GRMZM2G092091;GRMZM2G101350;GRMZM2G116785;GRMZM2G137358;GRMZM2G137541;GRMZM2G144275;GRMZM2G145579;GRMZM2G171818;GRMZM2G176289;GRMZM2G178182;GRMZM2G180406;GRMZM2G180452;GRMZM2G336408;GRMZM2G350165;GRMZM2G378653;GRMZM2G38554…
TFmatrixID_0174	bHLH	272	-	0.75	ccaCGCGC	AC197246.3_FG002;AC212449.4_FG005;AC233869.1_FG003;GRMZM2G008898;GRMZM2G024530;GRMZM2G027563;GRMZM2G030762;GRMZM2G046493;GRMZM2G067654;GRMZM2G074438;GRMZM2G080168;GRMZM2G083504;GRMZM2G092091;GRMZM2G101350;GRMZM2G116785;GRMZM2G137358;GRMZM2G137541;GRMZM2G144275;GRMZM2G145579;GRMZM2G171818;GRMZM2G176289;GRMZM2G178182;GRMZM2G180406;GRMZM2G180452;GRMZM2G336408;GRMZM2G350165;GRMZM2G378653;GRMZM2G38554…
TFmatrixID_0174	bHLH	931	-	0.75	ccaCTTGC	AC197246.3_FG002;AC212449.4_FG005;AC233869.1_FG003;GRMZM2G008898;GRMZM2G024530;GRMZM2G027563;GRMZM2G030762;GRMZM2G046493;GRMZM2G067654;GRMZM2G074438;GRMZM2G080168;GRMZM2G083504;GRMZM2G092091;GRMZM2G101350;GRMZM2G116785;GRMZM2G137358;GRMZM2G137541;GRMZM2G144275;GRMZM2G145579;GRMZM2G171818;GRMZM2G176289;GRMZM2G178182;GRMZM2G180406;GRMZM2G180452;GRMZM2G336408;GRMZM2G350165;GRMZM2G378653;GRMZM2G38554…
TFmatrixID_0174	bHLH	1095	+	0.88	GCACAtgc	AC197246.3_FG002;AC212449.4_FG005;AC233869.1_FG003;GRMZM2G008898;GRMZM2G024530;GRMZM2G027563;GRMZM2G030762;GRMZM2G046493;GRMZM2G067654;GRMZM2G074438;GRMZM2G080168;GRMZM2G083504;GRMZM2G092091;GRMZM2G101350;GRMZM2G116785;GRMZM2G137358;GRMZM2G137541;GRMZM2G144275;GRMZM2G145579;GRMZM2G171818;GRMZM2G176289;GRMZM2G178182;GRMZM2G180406;GRMZM2G180452;GRMZM2G336408;GRMZM2G350165;GRMZM2G378653;GRMZM2G38554…
TFmatrixID_0174	bHLH	1095	-	0.88	gcaCATGC	AC197246.3_FG002;AC212449.4_FG005;AC233869.1_FG003;GRMZM2G008898;GRMZM2G024530;GRMZM2G027563;GRMZM2G030762;GRMZM2G046493;GRMZM2G067654;GRMZM2G074438;GRMZM2G080168;GRMZM2G083504;GRMZM2G092091;GRMZM2G101350;GRMZM2G116785;GRMZM2G137358;GRMZM2G137541;GRMZM2G144275;GRMZM2G145579;GRMZM2G171818;GRMZM2G176289;GRMZM2G178182;GRMZM2G180406;GRMZM2G180452;GRMZM2G336408;GRMZM2G350165;GRMZM2G378653;GRMZM2G38554…
TFmatrixID_0174	bHLH	1142	+	0.75	ACACGtcc	AC197246.3_FG002;AC212449.4_FG005;AC233869.1_FG003;GRMZM2G008898;GRMZM2G024530;GRMZM2G027563;GRMZM2G030762;GRMZM2G046493;GRMZM2G067654;GRMZM2G074438;GRMZM2G080168;GRMZM2G083504;GRMZM2G092091;GRMZM2G101350;GRMZM2G116785;GRMZM2G137358;GRMZM2G137541;GRMZM2G144275;GRMZM2G145579;GRMZM2G171818;GRMZM2G176289;GRMZM2G178182;GRMZM2G180406;GRMZM2G180452;GRMZM2G336408;GRMZM2G350165;GRMZM2G378653;GRMZM2G38554…
TFmatrixID_0174	bHLH	1142	-	0.75	acaCGTCC	AC197246.3_FG002;AC212449.4_FG005;AC233869.1_FG003;GRMZM2G008898;GRMZM2G024530;GRMZM2G027563;GRMZM2G030762;GRMZM2G046493;GRMZM2G067654;GRMZM2G074438;GRMZM2G080168;GRMZM2G083504;GRMZM2G092091;GRMZM2G101350;GRMZM2G116785;GRMZM2G137358;GRMZM2G137541;GRMZM2G144275;GRMZM2G145579;GRMZM2G171818;GRMZM2G176289;GRMZM2G178182;GRMZM2G180406;GRMZM2G180452;GRMZM2G336408;GRMZM2G350165;GRMZM2G378653;GRMZM2G38554…
TFmatrixID_0176	bHLH	930	+	1	tccACTTGc	AC234203.1_FG014;GRMZM2G085467;GRMZM2G114873;GRMZM2G142932;GRMZM2G153454;GRMZM2G162382;GRMZM2G336408;GRMZM2G350165;GRMZM2G437481
TFmatrixID_0182	bZIP	1138	-	0.95	gcctaCACGTccg	GRMZM2G002075;GRMZM2G077124;GRMZM2G157722;GRMZM2G161009;GRMZM2G168079;GRMZM2G478417
TFmatrixID_0185	bZIP	792	-	0.97	agTGACGtga	GRMZM2G000842;GRMZM2G006578;GRMZM2G030877;GRMZM2G055993;GRMZM2G060216;GRMZM2G060290;GRMZM2G080731;GRMZM2G094352;GRMZM2G125243;GRMZM2G125934;GRMZM2G131961;GRMZM2G133331;GRMZM2G174284;GRMZM2G361847;GRMZM2G366264;GRMZM2G445575
TFmatrixID_0189	bZIP	792	-	0.99	agtgACGTGa	GRMZM2G045236;GRMZM2G060109
TFmatrixID_0189	bZIP	1036	+	0.97	tCACGTaata	GRMZM2G045236;GRMZM2G060109
TFmatrixID_0189	bZIP	1142	+	0.96	aCACGTccga	GRMZM2G045236;GRMZM2G060109
TFmatrixID_0191	bZIP	792	-	0.98	agtGACGTga	GRMZM2G000842;GRMZM2G006578;GRMZM2G030877;GRMZM2G055993;GRMZM2G060216;GRMZM2G060290;GRMZM2G080731;GRMZM2G094352;GRMZM2G125243;GRMZM2G125934;GRMZM2G131961;GRMZM2G133331;GRMZM2G174284;GRMZM2G361847;GRMZM2G366264;GRMZM2G380897;GRMZM2G445575
TFmatrixID_0193	bZIP	20	+	0.75	ACACCtgg	GRMZM2G002075;GRMZM2G157722;GRMZM2G161009;GRMZM2G168079;GRMZM2G478417
TFmatrixID_0193	bZIP	137	+	0.75	ACCCGcgt	GRMZM2G002075;GRMZM2G157722;GRMZM2G161009;GRMZM2G168079;GRMZM2G478417
TFmatrixID_0193	bZIP	137	-	0.75	accCGCGT	GRMZM2G002075;GRMZM2G157722;GRMZM2G161009;GRMZM2G168079;GRMZM2G478417
TFmatrixID_0193	bZIP	147	-	0.75	acgCTTGT	GRMZM2G002075;GRMZM2G157722;GRMZM2G161009;GRMZM2G168079;GRMZM2G478417
TFmatrixID_0193	bZIP	676	+	0.75	ACTCGttt	GRMZM2G002075;GRMZM2G157722;GRMZM2G161009;GRMZM2G168079;GRMZM2G478417
TFmatrixID_0193	bZIP	676	-	0.75	actCGTTT	GRMZM2G002075;GRMZM2G157722;GRMZM2G161009;GRMZM2G168079;GRMZM2G478417
TFmatrixID_0193	bZIP	866	-	0.75	aaaAGTGT	GRMZM2G002075;GRMZM2G157722;GRMZM2G161009;GRMZM2G168079;GRMZM2G478417
TFmatrixID_0193	bZIP	968	-	0.75	ccaGGTGT	GRMZM2G002075;GRMZM2G157722;GRMZM2G161009;GRMZM2G168079;GRMZM2G478417
TFmatrixID_0193	bZIP	1075	-	0.75	cccCGTGT	GRMZM2G002075;GRMZM2G157722;GRMZM2G161009;GRMZM2G168079;GRMZM2G478417
TFmatrixID_0193	bZIP	1142	+	0.75	ACACGtcc	GRMZM2G002075;GRMZM2G157722;GRMZM2G161009;GRMZM2G168079;GRMZM2G478417
TFmatrixID_0194	bZIP	1140	+	0.94	ctaCACGTcc	GRMZM2G011932;GRMZM2G019106;GRMZM2G074373;GRMZM2G117851;GRMZM2G153144;GRMZM2G164622;GRMZM2G171370
TFmatrixID_0195	bZIP	792	-	1	agTGACGtga	GRMZM2G000842;GRMZM2G006578;GRMZM2G030877;GRMZM2G055993;GRMZM2G060216;GRMZM2G060290;GRMZM2G080731;GRMZM2G094352;GRMZM2G125243;GRMZM2G125934;GRMZM2G131961;GRMZM2G133331;GRMZM2G174284;GRMZM2G361847;GRMZM2G366264;GRMZM2G380897;GRMZM2G445575
TFmatrixID_0196	bZIP	793	-	0.99	gTGACGtg	GRMZM2G000842;GRMZM2G006578;GRMZM2G030877;GRMZM2G055993;GRMZM2G060216;GRMZM2G060290;GRMZM2G080731;GRMZM2G094352;GRMZM2G125243;GRMZM2G125934;GRMZM2G131961;GRMZM2G133331;GRMZM2G174284;GRMZM2G361847;GRMZM2G366264;GRMZM2G380897;GRMZM2G445575
TFmatrixID_0197	bZIP	792	-	0.95	agTGACGtga	GRMZM2G000842;GRMZM2G006578;GRMZM2G030877;GRMZM2G055993;GRMZM2G060216;GRMZM2G060290;GRMZM2G080731;GRMZM2G094352;GRMZM2G125243;GRMZM2G125934;GRMZM2G131961;GRMZM2G133331;GRMZM2G174284;GRMZM2G361847;GRMZM2G366264;GRMZM2G445575
TFmatrixID_0197	bZIP	1238	+	0.91	ggcCGTCAac	GRMZM2G000842;GRMZM2G006578;GRMZM2G030877;GRMZM2G055993;GRMZM2G060216;GRMZM2G060290;GRMZM2G080731;GRMZM2G094352;GRMZM2G125243;GRMZM2G125934;GRMZM2G131961;GRMZM2G133331;GRMZM2G174284;GRMZM2G361847;GRMZM2G366264;GRMZM2G445575
TFmatrixID_0198	bZIP	791	-	0.97	tagtGACGTgaa	GRMZM2G007063;GRMZM2G016150;GRMZM2G019446;GRMZM2G073427;GRMZM2G098904;GRMZM2G103647
TFmatrixID_0198	bZIP	1141	+	0.94	tacACGTCcgag	GRMZM2G007063;GRMZM2G016150;GRMZM2G019446;GRMZM2G073427;GRMZM2G098904;GRMZM2G103647
TFmatrixID_0199	bZIP	792	-	1	agTGACGtga	GRMZM2G000842;GRMZM2G006578;GRMZM2G030877;GRMZM2G055993;GRMZM2G060216;GRMZM2G060290;GRMZM2G080731;GRMZM2G094352;GRMZM2G125243;GRMZM2G125934;GRMZM2G131961;GRMZM2G133331;GRMZM2G174284;GRMZM2G361847;GRMZM2G366264;GRMZM2G380897;GRMZM2G445575
TFmatrixID_0213	C2H2	307	+	1	cACACTc	AC185108.3_FG011
TFmatrixID_0213	C2H2	868	-	1	aAGTGTt	AC185108.3_FG011
TFmatrixID_0214	C2H2	304	+	0.99	cagcACACTcact	GRMZM2G001205;GRMZM2G061897;GRMZM2G112799;GRMZM2G338056;GRMZM2G376061
TFmatrixID_0215	C2H2	307	+	1	cACACTc	GRMZM2G001205;GRMZM2G061897;GRMZM2G307402
TFmatrixID_0219	C2H2	307	+	1	cACACTc	GRMZM2G089557
TFmatrixID_0220	CAMTA	139	+	1	cCGCGTgga	GRMZM2G341747
TFmatrixID_0220	CAMTA	271	-	0.98	cccACGCGc	GRMZM2G341747
TFmatrixID_0220	CAMTA	699	+	1	cCGCGTgaa	GRMZM2G341747
TFmatrixID_0220	CAMTA	1128	+	1	cCGCGTctc	GRMZM2G341747
TFmatrixID_0221	CAMTA	136	+	1	caccCGCGT	GRMZM2G341747
TFmatrixID_0221	CAMTA	274	-	0.99	ACGCGctcg	GRMZM2G341747
TFmatrixID_0221	CAMTA	696	+	1	aaacCGCGT	GRMZM2G341747
TFmatrixID_0221	CAMTA	1125	+	1	tcccCGCGT	GRMZM2G341747
TFmatrixID_0228	CPP	616	+	1	caTTTAAatg	GRMZM2G153754
TFmatrixID_0228	CPP	616	-	1	catTTAAAtg	GRMZM2G153754
TFmatrixID_0252	E2F/DP	182	-	0.99	ctggGCGCGg	AC233850.1_FG005
TFmatrixID_0252	E2F/DP	1100	-	0.99	tgcgGCGCGa	AC233850.1_FG005
TFmatrixID_0264	GATA	176	-	1	cctGATCTgg	AC202864.3_FG002;GRMZM2G044576;GRMZM2G054615;GRMZM2G101058;GRMZM2G110295;GRMZM2G113098;GRMZM2G135381;GRMZM2G140669;GRMZM2G163200;GRMZM2G379005;GRMZM2G404973;GRMZM2G406387
TFmatrixID_0265	GATA	175	-	0.95	acctGATCTg	AC202864.3_FG002;GRMZM2G044576;GRMZM2G054615;GRMZM2G101058;GRMZM2G110295;GRMZM2G113098;GRMZM2G135381;GRMZM2G140669;GRMZM2G163200;GRMZM2G379005;GRMZM2G404973
TFmatrixID_0266	GATA	177	+	0.99	ctGATCTgg	AC202864.3_FG002;GRMZM2G044576;GRMZM2G054615;GRMZM2G101058;GRMZM2G110295;GRMZM2G113098;GRMZM2G135381;GRMZM2G140669;GRMZM2G163200;GRMZM2G379005;GRMZM2G404973;GRMZM2G406387
TFmatrixID_0267	GATA	176	-	0.99	cctGATCTgg	AC202864.3_FG002;GRMZM2G044576;GRMZM2G054615;GRMZM2G101058;GRMZM2G110295;GRMZM2G113098;GRMZM2G135381;GRMZM2G140669;GRMZM2G163200;GRMZM2G379005;GRMZM2G404973;GRMZM2G406387
TFmatrixID_0270	GATA	175	-	1	acctGATCTg	AC202864.3_FG002;GRMZM2G044576;GRMZM2G054615;GRMZM2G101058;GRMZM2G110295;GRMZM2G113098;GRMZM2G135381;GRMZM2G140669;GRMZM2G163200;GRMZM2G379005;GRMZM2G404973;GRMZM2G406387
TFmatrixID_0281	HD-ZIP	352	-	1	acAATAAtg	GRMZM2G003304;GRMZM2G021339;GRMZM2G041127;GRMZM2G056600;GRMZM2G097349;GRMZM2G122076;GRMZM2G139963;GRMZM2G178741
TFmatrixID_0300	TALE;Homeodomain	1238	-	0.99	ggcCGTCAac	GRMZM2G017087;GRMZM2G028041;GRMZM2G032332;GRMZM2G061101;GRMZM2G087741;GRMZM2G094241;GRMZM2G452178
TFmatrixID_0310	Trihelix	375	-	0.99	ggGTAAAtgt	GRMZM2G111760
TFmatrixID_0310	Trihelix	742	+	0.98	taaTTTACta	GRMZM2G111760
TFmatrixID_0311	Trihelix	375	-	0.99	ggGTAAAtgt	GRMZM2G111760
TFmatrixID_0311	Trihelix	742	+	0.99	taaTTTACta	GRMZM2G111760
TFmatrixID_0312	Trihelix	946	+	0.99	tccaGGTTAa	GRMZM2G047370
TFmatrixID_0317	Trihelix	946	+	0.99	tccaGGTTAa	GRMZM2G047370
TFmatrixID_0320	Myb/SANT;MYB-related	773	+	0.86	gcGATATtt	AC209374.4_FG003;GRMZM2G057408;GRMZM2G135052;GRMZM2G170148
TFmatrixID_0323	MYB-related	773	-	0.99	gcGATATtta	GRMZM2G145041
TFmatrixID_0334	MYB-related	774	-	0.98	cGATATtta	GRMZM2G145041
TFmatrixID_0334	MYB-related	816	-	0.96	cGATATtgt	GRMZM2G145041
TFmatrixID_0348	ARR-B	473	+	0.97	gaggATCTTc	GRMZM2G099797;GRMZM2G126834
TFmatrixID_0357	G2-like	450	+	0.97	aaAATATtca	GRMZM2G034563;GRMZM2G056400;GRMZM2G060834;GRMZM2G070865;GRMZM2G082264;GRMZM2G123308;GRMZM2G175827;GRMZM2G315506;GRMZM2G370425
TFmatrixID_0357	G2-like	450	-	0.97	aaaATATTca	GRMZM2G034563;GRMZM2G056400;GRMZM2G060834;GRMZM2G070865;GRMZM2G082264;GRMZM2G123308;GRMZM2G175827;GRMZM2G315506;GRMZM2G370425
TFmatrixID_0365	MYB-related	544	+	1	cgtTAGGGta	GRMZM2G023667;GRMZM2G108424
TFmatrixID_0381	NAC	1037	-	0.97	cACGTAat	GRMZM2G011598;GRMZM2G014653;GRMZM2G018553;GRMZM2G042494;GRMZM2G068973;GRMZM2G079632;GRMZM2G109627;GRMZM2G123667;GRMZM2G127379;GRMZM2G162739;GRMZM2G179885;GRMZM2G180328;GRMZM2G312201;GRMZM2G336533;GRMZM2G347043;GRMZM2G430849
TFmatrixID_0383	NAC	1035	+	0.96	ttcACGTAat	AC212859.3_FG008;GRMZM2G025642;GRMZM2G041668;GRMZM2G041746;GRMZM2G069047;GRMZM2G091490;GRMZM2G092465;GRMZM2G099144;GRMZM2G104074;GRMZM2G171395;GRMZM2G178998;GRMZM2G315140;GRMZM2G354151;GRMZM2G435824;GRMZM2G440219
TFmatrixID_0388	NAC	457	-	0.98	tCACGCcag	GRMZM2G008374;GRMZM2G009892;GRMZM2G018436;GRMZM2G031001;GRMZM2G062650;GRMZM2G139700;GRMZM2G154182;GRMZM2G159500;GRMZM2G181605;GRMZM2G393433;GRMZM2G430522
TFmatrixID_0391	NAC	457	-	0.98	tCACGCcagc	GRMZM2G008374;GRMZM2G009892;GRMZM2G018436;GRMZM2G031001;GRMZM2G062650;GRMZM2G139700;GRMZM2G154182;GRMZM2G159500;GRMZM2G181605;GRMZM2G393433;GRMZM2G430522
TFmatrixID_0391	NAC	963	-	0.98	cCACGCcagg	GRMZM2G008374;GRMZM2G009892;GRMZM2G018436;GRMZM2G031001;GRMZM2G062650;GRMZM2G139700;GRMZM2G154182;GRMZM2G159500;GRMZM2G181605;GRMZM2G393433;GRMZM2G430522
TFmatrixID_0393	NAC	457	-	0.98	tCACGCcagc	GRMZM2G008374;GRMZM2G009892;GRMZM2G031001;GRMZM2G062650;GRMZM2G139700;GRMZM2G154182;GRMZM2G159500;GRMZM2G181605;GRMZM2G393433;GRMZM2G430522
TFmatrixID_0395	NAC	455	-	0.99	attCACGCca	GRMZM2G008374;GRMZM2G009892;GRMZM2G018436;GRMZM2G031001;GRMZM2G062650;GRMZM2G139700;GRMZM2G154182;GRMZM2G159500;GRMZM2G181605;GRMZM2G393433;GRMZM2G430522
TFmatrixID_0417	GeBP	279	+	0.99	ctCGACCca	GRMZM2G026417;GRMZM2G030458;GRMZM2G075122;GRMZM2G082318
TFmatrixID_0422	TCP	958	+	0.97	ccGGACCacg	AC205574.3_FG006;GRMZM2G015037
TFmatrixID_0423	TCP	959	+	0.94	cGGACCac	AC205574.3_FG006;GRMZM2G015037
TFmatrixID_0427	TCP	327	+	0.87	gGGACCcc	GRMZM2G120151;GRMZM2G166946
TFmatrixID_0427	TCP	959	+	0.87	cGGACCac	GRMZM2G120151;GRMZM2G166946
TFmatrixID_0432	TCP	327	+	0.87	gGGACCcc	GRMZM2G120151;GRMZM2G166946
TFmatrixID_0432	TCP	959	+	0.88	cGGACCac	GRMZM2G120151;GRMZM2G166946
TFmatrixID_0436	TCP	325	+	0.87	tagGGACCcc	AC205574.3_FG006;GRMZM2G015037
TFmatrixID_0436	TCP	957	+	0.87	accGGACCac	AC205574.3_FG006;GRMZM2G015037
TFmatrixID_0440	TCP	54	+	0.92	aGGACCag	AC190734.2_FG003;GRMZM2G020805;GRMZM2G035944;GRMZM2G089361;GRMZM2G115516;GRMZM2G120151;GRMZM2G166946
TFmatrixID_0440	TCP	959	+	0.94	cGGACCac	AC190734.2_FG003;GRMZM2G020805;GRMZM2G035944;GRMZM2G089361;GRMZM2G115516;GRMZM2G120151;GRMZM2G166946
TFmatrixID_0442	WRKY	670	+	0.98	atGTCAActc	AC165171.2_FG002;AC198725.4_FG009;AC205562.3_FG002;AC209050.3_FG003;AC233880.1_FG010;GRMZM2G003551;GRMZM2G005207;GRMZM2G006497;GRMZM2G012724;GRMZM2G013391;GRMZM2G015433;GRMZM2G018487;GRMZM2G018721;GRMZM2G024505;GRMZM2G024898;GRMZM2G025895;GRMZM2G038158;GRMZM2G040298;GRMZM2G048450;GRMZM2G052671;GRMZM2G054125;GRMZM2G057011;GRMZM2G057116;GRMZM2G061408;GRMZM2G065290;GRMZM2G070211;GRMZM2G071907;GRMZM2…
TFmatrixID_0442	WRKY	1240	+	0.98	ccGTCAAcac	AC165171.2_FG002;AC198725.4_FG009;AC205562.3_FG002;AC209050.3_FG003;AC233880.1_FG010;GRMZM2G003551;GRMZM2G005207;GRMZM2G006497;GRMZM2G012724;GRMZM2G013391;GRMZM2G015433;GRMZM2G018487;GRMZM2G018721;GRMZM2G024505;GRMZM2G024898;GRMZM2G025895;GRMZM2G038158;GRMZM2G040298;GRMZM2G048450;GRMZM2G052671;GRMZM2G054125;GRMZM2G057011;GRMZM2G057116;GRMZM2G061408;GRMZM2G065290;GRMZM2G070211;GRMZM2G071907;GRMZM2…
TFmatrixID_0447	WRKY	669	+	0.99	catGTCAAct	AC165171.2_FG002;AC198725.4_FG009;AC205562.3_FG002;AC209050.3_FG003;AC233880.1_FG010;GRMZM2G003551;GRMZM2G005207;GRMZM2G006497;GRMZM2G012724;GRMZM2G013391;GRMZM2G015433;GRMZM2G018487;GRMZM2G018721;GRMZM2G023563;GRMZM2G024505;GRMZM2G024898;GRMZM2G025895;GRMZM2G029282;GRMZM2G038158;GRMZM2G040298;GRMZM2G048450;GRMZM2G052671;GRMZM2G054125;GRMZM2G057011;GRMZM2G057116;GRMZM2G061408;GRMZM2G063880;GRMZM2…
TFmatrixID_0450	WRKY	669	+	0.98	catGTCAAct	AC165171.2_FG002;AC198725.4_FG009;AC205562.3_FG002;AC209050.3_FG003;AC233880.1_FG010;GRMZM2G003551;GRMZM2G005207;GRMZM2G006497;GRMZM2G012724;GRMZM2G013391;GRMZM2G015433;GRMZM2G018487;GRMZM2G018721;GRMZM2G024505;GRMZM2G024898;GRMZM2G025895;GRMZM2G034421;GRMZM2G038158;GRMZM2G040298;GRMZM2G048450;GRMZM2G052671;GRMZM2G054125;GRMZM2G057011;GRMZM2G057116;GRMZM2G061408;GRMZM2G063880;GRMZM2G070211;GRMZM2…
TFmatrixID_0450	WRKY	1239	+	0.98	gccGTCAAca	AC165171.2_FG002;AC198725.4_FG009;AC205562.3_FG002;AC209050.3_FG003;AC233880.1_FG010;GRMZM2G003551;GRMZM2G005207;GRMZM2G006497;GRMZM2G012724;GRMZM2G013391;GRMZM2G015433;GRMZM2G018487;GRMZM2G018721;GRMZM2G024505;GRMZM2G024898;GRMZM2G025895;GRMZM2G034421;GRMZM2G038158;GRMZM2G040298;GRMZM2G048450;GRMZM2G052671;GRMZM2G054125;GRMZM2G057011;GRMZM2G057116;GRMZM2G061408;GRMZM2G063880;GRMZM2G070211;GRMZM2…
TFmatrixID_0453	WRKY	1241	+	0.9	cGTCAAca	AC165171.2_FG002;AC198725.4_FG009;AC209050.3_FG003;AC233880.1_FG010;GRMZM2G003551;GRMZM2G004060;GRMZM2G005207;GRMZM2G006497;GRMZM2G012724;GRMZM2G013391;GRMZM2G015433;GRMZM2G018487;GRMZM2G018721;GRMZM2G024505;GRMZM2G024898;GRMZM2G038158;GRMZM2G040298;GRMZM2G048450;GRMZM2G052671;GRMZM2G054125;GRMZM2G057011;GRMZM2G057116;GRMZM2G063216;GRMZM2G069668;GRMZM2G070211;GRMZM2G071907;GRMZM2G073272;GRMZM2G08…
TFmatrixID_0455	WRKY	669	+	0.95	catGTCAActc	AC165171.2_FG002;AC193630.3_FG003;AC198725.4_FG009;AC205562.3_FG002;AC209050.3_FG003;AC233880.1_FG010;GRMZM2G003551;GRMZM2G006497;GRMZM2G012724;GRMZM2G013391;GRMZM2G015433;GRMZM2G018487;GRMZM2G018721;GRMZM2G024505;GRMZM2G024898;GRMZM2G025895;GRMZM2G030272;GRMZM2G038158;GRMZM2G040298;GRMZM2G048450;GRMZM2G052671;GRMZM2G054125;GRMZM2G057011;GRMZM2G057116;GRMZM2G061408;GRMZM2G063880;GRMZM2G070211;GRM…
TFmatrixID_0455	WRKY	1239	+	0.94	gccGTCAAcac	AC165171.2_FG002;AC193630.3_FG003;AC198725.4_FG009;AC205562.3_FG002;AC209050.3_FG003;AC233880.1_FG010;GRMZM2G003551;GRMZM2G006497;GRMZM2G012724;GRMZM2G013391;GRMZM2G015433;GRMZM2G018487;GRMZM2G018721;GRMZM2G024505;GRMZM2G024898;GRMZM2G025895;GRMZM2G030272;GRMZM2G038158;GRMZM2G040298;GRMZM2G048450;GRMZM2G052671;GRMZM2G054125;GRMZM2G057011;GRMZM2G057116;GRMZM2G061408;GRMZM2G063880;GRMZM2G070211;GRM…
TFmatrixID_0457	WRKY	670	+	0.99	atGTCAActc	AC165171.2_FG002;AC198725.4_FG009;AC205562.3_FG002;AC209050.3_FG003;AC233880.1_FG010;GRMZM2G003551;GRMZM2G005207;GRMZM2G006497;GRMZM2G012724;GRMZM2G013391;GRMZM2G015433;GRMZM2G018487;GRMZM2G018721;GRMZM2G023563;GRMZM2G024505;GRMZM2G024898;GRMZM2G025895;GRMZM2G029282;GRMZM2G034421;GRMZM2G038158;GRMZM2G040298;GRMZM2G048450;GRMZM2G052671;GRMZM2G054125;GRMZM2G057011;GRMZM2G057116;GRMZM2G061408;GRMZM2…
TFmatrixID_0457	WRKY	1240	+	0.98	ccGTCAAcac	AC165171.2_FG002;AC198725.4_FG009;AC205562.3_FG002;AC209050.3_FG003;AC233880.1_FG010;GRMZM2G003551;GRMZM2G005207;GRMZM2G006497;GRMZM2G012724;GRMZM2G013391;GRMZM2G015433;GRMZM2G018487;GRMZM2G018721;GRMZM2G023563;GRMZM2G024505;GRMZM2G024898;GRMZM2G025895;GRMZM2G029282;GRMZM2G034421;GRMZM2G038158;GRMZM2G040298;GRMZM2G048450;GRMZM2G052671;GRMZM2G054125;GRMZM2G057011;GRMZM2G057116;GRMZM2G061408;GRMZM2…
TFmatrixID_0461	WRKY	671	+	0.98	tGTCAActcg	AC165171.2_FG002;AC205562.3_FG002;AC233880.1_FG010;GRMZM2G003551;GRMZM2G004060;GRMZM2G005207;GRMZM2G006497;GRMZM2G012724;GRMZM2G013391;GRMZM2G015433;GRMZM2G018487;GRMZM2G024505;GRMZM2G024898;GRMZM2G025895;GRMZM2G029282;GRMZM2G030272;GRMZM2G038158;GRMZM2G040298;GRMZM2G048450;GRMZM2G052671;GRMZM2G054125;GRMZM2G057011;GRMZM2G057116;GRMZM2G059562;GRMZM2G060918;GRMZM2G061408;GRMZM2G063216;GRMZM2G06388…
TFmatrixID_0461	WRKY	1241	+	0.98	cGTCAAcacc	AC165171.2_FG002;AC205562.3_FG002;AC233880.1_FG010;GRMZM2G003551;GRMZM2G004060;GRMZM2G005207;GRMZM2G006497;GRMZM2G012724;GRMZM2G013391;GRMZM2G015433;GRMZM2G018487;GRMZM2G024505;GRMZM2G024898;GRMZM2G025895;GRMZM2G029282;GRMZM2G030272;GRMZM2G038158;GRMZM2G040298;GRMZM2G048450;GRMZM2G052671;GRMZM2G054125;GRMZM2G057011;GRMZM2G057116;GRMZM2G059562;GRMZM2G060918;GRMZM2G061408;GRMZM2G063216;GRMZM2G06388…
TFmatrixID_0472	Dof	1189	+	1	AAAGCa	GRMZM2G009406
TFmatrixID_0473	Dof	1165	-	1	cGCTTT	GRMZM2G179069
TFmatrixID_0478	Dof	1166	-	1	GCTTT	MNB1A_MAIZE
TFmatrixID_0478	Dof	1189	+	1	AAAGC	MNB1A_MAIZE
TFmatrixID_0480	Dof	1166	-	1	GCTTT	GRMZM2G146283
TFmatrixID_0480	Dof	1189	+	1	AAAGC	GRMZM2G146283
TFmatrixID_0490	bZIP	794	-	0.99	tGACGTg	GRMZM2G000842;GRMZM2G006578;GRMZM2G030877;GRMZM2G055993;GRMZM2G060216;GRMZM2G060290;GRMZM2G080731;GRMZM2G094352;GRMZM2G125243;GRMZM2G125934;GRMZM2G131961;GRMZM2G133331;GRMZM2G174284;GRMZM2G361847;GRMZM2G366264;GRMZM2G445575
TFmatrixID_0497	bHLH	788	+	0.87	aaatagtgACGTGa	GRMZM2G017349;GRMZM2G027563;GRMZM2G030744;GRMZM2G042920;GRMZM2G062458;GRMZM2G062541;GRMZM2G065374;GRMZM2G067654;GRMZM2G080054;GRMZM2G087622;GRMZM2G115960;GRMZM2G165042;GRMZM2G180452;GRMZM2G336408;GRMZM2G350165
TFmatrixID_0512	ERF	1151	+	0.99	aGCCGCca	AC198979.4_FG009;AC233933.1_FG001;GRMZM2G021790;GRMZM2G024871;GRMZM2G055180;GRMZM2G060206;GRMZM2G060517;GRMZM2G073258;GRMZM2G080516;GRMZM2G123119;GRMZM2G317596;GRMZM2G379652;GRMZM2G381441;GRMZM2G466044;GRMZM2G474326;GRMZM2G478965
TFmatrixID_0528	ERF;RAV	19	+	0.99	tacACCTGgatc	GRMZM2G059939;GRMZM2G159592;GRMZM2G169654
TFmatrixID_0528	ERF;RAV	172	+	0.99	cgcACCTGatct	GRMZM2G059939;GRMZM2G159592;GRMZM2G169654
TFmatrixID_0528	ERF;RAV	965	-	0.99	acgcCAGGTgtt	GRMZM2G059939;GRMZM2G159592;GRMZM2G169654
TFmatrixID_0533	bZIP	791	-	0.98	tagTGACGtga	GRMZM2G000842;GRMZM2G006578;GRMZM2G030877;GRMZM2G055993;GRMZM2G060216;GRMZM2G060290;GRMZM2G080731;GRMZM2G094352;GRMZM2G125243;GRMZM2G125934;GRMZM2G131961;GRMZM2G133331;GRMZM2G174284;GRMZM2G361847;GRMZM2G366264;GRMZM2G380897;GRMZM2G445575
TFmatrixID_0548	Dof	1164	-	0.99	gcgCTTTAagt	MNB1A_MAIZE
TFmatrixID_0549	Dof	1164	-	1	gcGCTTTaagt	GRMZM2G009406
TFmatrixID_0549	Dof	1185	+	0.99	acgaAAAGCag	GRMZM2G009406
TFmatrixID_0555	bZIP	425	+	0.74	tATCTAcggaaaacga	GRMZM2G007063;GRMZM2G015534;GRMZM2G016150;GRMZM2G019446;GRMZM2G073427
TFmatrixID_0557	Dof	44	+	0.99	tatAAAAGgga	GRMZM2G146283
TFmatrixID_0561	ERF;RAV	19	+	0.99	tacACCTGgatc	GRMZM2G059939;GRMZM2G159592;GRMZM2G169654
TFmatrixID_0561	ERF;RAV	172	+	0.99	cgcACCTGatct	GRMZM2G059939;GRMZM2G159592;GRMZM2G169654
TFmatrixID_0561	ERF;RAV	965	-	0.99	acgcCAGGTgtt	GRMZM2G059939;GRMZM2G159592;GRMZM2G169654
TFmatrixID_0569	TBP	43	+	1	ctATAAAagggagga	GRMZM2G149238;GRMZM2G161418
TFmatrixID_0569	TBP	829	-	0.98	ttcatagtTTTATag	GRMZM2G149238;GRMZM2G161418
TFmatrixID_0570	TBP	42	+	1	actaTAAAAg	GRMZM2G149238;GRMZM2G161418
TFmatrixID_0570	TBP	835	-	0.99	gTTTTAtagc	GRMZM2G149238;GRMZM2G161418
TFmatrixID_0580	AT-Hook	450	+	1	aAAATAt	GRMZM2G008456;GRMZM2G127034
TFmatrixID_0581	AT-Hook	733	-	0.85	ATATTcacataattt	GRMZM2G008456;GRMZM2G127034
TFmatrixID_0585	TBP	42	+	0.97	actATAAAagg	GRMZM2G149238;GRMZM2G161418
TFmatrixID_0585	TBP	834	-	0.97	agtTTTATagc	GRMZM2G149238;GRMZM2G161418
